# Supplementary material for: [closo-B10H10]2−as a structural element for quadrupolar liquid crystals: a new class of liquid crystalline NLO chromophores
Source: Royal Society of Chemistry journal article supplement (doi:10.1039/c2tc00547f), 2012-11-22
Supplement: c2tc00547f.pdf [file c2tc00547f.pdf]

Electronic Supporting Information for:

**[*closo*-B<sub>10</sub>H<sub>10</sub>]<sup>2-</sup> as a Structural Element for Highly Quadrupolar Liquid Crystals: A new Class of  
Liquid Crystalline NLO Chromophores**

Aleksandra Jankowiak,<sup>a</sup> Kristein Mason,<sup>a</sup> Andrzej Balinski,<sup>a</sup> James E. Harvey,<sup>a</sup> Adam Januszko,<sup>a</sup>  
Piotr Kaszynski,<sup>a,b,\*</sup> Victor G. Young Jr.,<sup>c</sup> and Andre Persoons<sup>d</sup>

<sup>a</sup> *Organic Materials Research Group, Department of Chemistry, Vanderbilt University, Nashville, TN*

37235

<sup>b</sup> *Faculty of Chemistry, University of Łódź, Tamka 12, 91403 Łódź, Poland*

<sup>c</sup> *X-ray Crystallographic Laboratory, Department of Chemistry, University of Minnesota, Twin*

*Cities, MN 55455*

<sup>d</sup> *Department of Chemistry, University of Leuven, Celestijnenlaan 200D, 3001 Leuven, Belgium.*

**Table of Content:**

|                                                                          |           |
|--------------------------------------------------------------------------|-----------|
| 1. Additional synthetic details                                          | ..... S2  |
| 2. Computational details                                                 | ..... S7  |
| 3. Equilibrium and kinetic data                                          | ..... S8  |
| 4. Fluorescence quantum yield                                            | ..... S11 |
| 5. Solvatochromic data                                                   | ..... S12 |
| 6. Lippert-Mataga calculations                                           | ..... S14 |
| 7. Calculations for the nematic phase using the Maier-Meier relationship | ..... S15 |
| 8. Crystal Structure Data                                                | ..... S17 |
| 9. Archive files for DFT geometry optimizations                          | ..... S18 |
| 10. References                                                           | ..... S39 |

## 1. Additional synthetic details

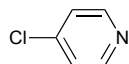

**4-Chloropyridine.**<sup>1</sup> It was obtained according to a modified literature procedure.<sup>1</sup> 4-Chloropyridine hydrochloride (9.96 g, 64.2 mmol) was dissolved in cold water (60 mL) and a cold solution of 2M KOH (50 mL) was added in one portion. The resulting free pyridine was extracted into petroleum ether (3x), the combined extracts were dried (Na<sub>2</sub>SO<sub>4</sub>), solvent removed, and the resulting 4-chloropyridine was immediately used without further purification.

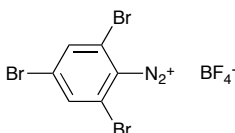

**2,4,6-Tribromobenzenediazonium Tetrafluoroborate.**<sup>2</sup> According to the literature procedure,<sup>2</sup> 2,4,6-tribromoaniline (20.05 g, 59.3 mmol) was dissolved in a mixture of acetic acid (135 mL) and tetrafluoroboric acid (20 mL) and cooled in a ice bath. *iso*-Amyl nitrite (12.5 mL, 94 mmol) was added dropwise at 10 °C causing precipitation. The solution was warmed up and the precipitate dissolved. After 30 min ether was added and the mixture was cooled in an ice bath. The resulting precipitation was filtered and the solid dried giving 24.00 g (94% yield) of the diazonium salt as a yellow solid: <sup>1</sup>H NMR (400 MHz, CD<sub>3</sub>CN) δ 8.42 (s).

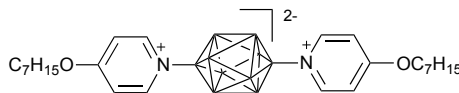

**[closo-B<sub>10</sub>H<sub>8</sub>-1,10-bis(4-heptyloxy)pyridinyl] (1).**<sup>3</sup> Compound was obtained from bis-dinitrogen derivative **12**<sup>4</sup> and 4-heptyloxy pyridine (**10b**) as described before: <sup>1</sup>H NMR (300 MHz, CDCl<sub>3</sub>) δ 0.92 (t, *J* = 6.8 Hz, 6H), 1.0-3.0 (m, 8H), 1.28-1.60 (m, 16H), 1.90 (quin, *J* = 7.2 Hz, 4H), 4.22 (t, *J* = 6.6 Hz, 4H), 7.12 (d, *J* = 7.2 Hz, 4H), 9.34 (d, *J* = 7.2 Hz, 4H); <sup>1</sup>H NMR

(300 MHz, C<sub>6</sub>D<sub>6</sub>) δ 0.91 (t, *J* = 6.8 Hz, 6H), 1.0-3.0 (m, 8H), 1.21 (brs, 16H), 1.46 (brs, 4H), 3.44 (brs, 4H), 6.14 (brs, 4H), 9.12 (d, *J* = 6.6 Hz, 4H); <sup>13</sup>C NMR (75 MHz, C<sub>6</sub>D<sub>6</sub>) δ 14.3, 23.0, 26.0, 28.7, 29.2, 32.0, 69.6, 111.3, 149.3, 168.0.

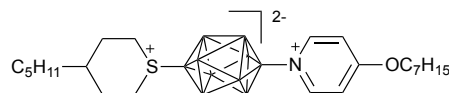

**[closo-B<sub>10</sub>H<sub>8</sub>-1-(4-Heptyloxy-pyridinyl)-10-(4-pentyl-1-thiacyclohexyl)] (2b).** NMR

spectra in other solvents:

<sup>13</sup>C NMR (100 MHz, toluene-*d*<sub>8</sub>, -40 °C) δ 14.5, 23.2, 26.2, 26.5, 28.8, 29.6, 30.9, 32.3, 32.4, 35.6, 36.6, 41.8, 69.3, 110.9, 148.6, 167.7.

<sup>13</sup>C NMR (75 MHz, C<sub>6</sub>D<sub>6</sub>) δ 14.3, 22.9, 23.0, 25.9, 26.2, 28.7, 29.2, 31.1, 32.0, 32.2, 35.8, 36.5, 42.0, 69.6, 111.3, 149.0, 168.1. Signals ascribed to the **2b-cis** isomer: 26.5, 35.9

**Decomposition product of 2b:** An unidentified decomposition product was separated from an aged sample of **2b** as a less mobile fraction (Chromatotron, SiO<sub>2</sub>, hexanes/CH<sub>2</sub>Cl<sub>2</sub> 2:1). It was obtained as a colorless solid and purity > 95% by NMR: <sup>1</sup>H NMR (400 MHz, CDCl<sub>3</sub>) δ 0.0-1.6 (br m, 8H), 0.86 (t, *J* = 7.2 Hz, 3H), 0.89 (t, *J* = 6.7 Hz, 3H), 1.02-1.48 (m, 16H), 1.62 (brs, 2H), 1.81 (quin. *J* = 7.0 Hz, 2H), 2.06 (br t, *J* = 13.8 Hz, 2H), 2.59 (dm, *J* = 12.8 Hz, 1H), 2.64 (dm, *J* = 13.1 Hz, 1H), 2.75-2.94 (m, 1H), 2.98 (dm, *J* = 12.4 Hz, 1H), 3.09 (dm, *J* = 12.7 Hz, 1H), 4.09 (t, *J* = 6.5 Hz, 2H), 6.84 (d, *J* = 7.3 Hz, 2H), 8.42 (d, *J* = 7.2 Hz, 2H); <sup>13</sup>C NMR (CDCl<sub>3</sub>, 100 MHz) δ 13.95, 14.00, 22.5, 25.6, 26.00, 28.4, 28.8, 31.0, 31.6, 31.7, 35.7, 36.3, 38.4, 38.8, 70.0, 111.2, 149.0, 168.5; <sup>11</sup>B NMR (128 MHz, CDCl<sub>3</sub>) δ -31.3 (1B), -27.7 (2B), -22.6 (1B), -15.2 (1B), -6.4 (1B), -3.0 (d, 2B), -0.9 (d, 2B); IR 2499 (B-H), 1634, 1514, 1310, 1165 cm<sup>-1</sup>; HRMS, calcd for C<sub>22</sub>H<sub>47</sub>B<sub>10</sub>NO<sub>2</sub>S: *m/z* 499.4258; found: *m/z* 499.4289.

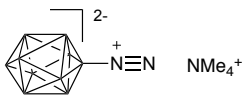

**Preparation of [closo-B<sub>10</sub>H<sub>9</sub>-1-N<sub>2</sub>]<sup>2-</sup> [NMe<sub>4</sub>]<sup>+</sup> (6[NMe<sub>4</sub>]).**<sup>5,6</sup> It was prepared according to the literature procedure<sup>5,6</sup> from [closo-B<sub>10</sub>H<sub>10</sub>]<sup>2-</sup>: <sup>1</sup>H NMR (400 MHz, CD<sub>3</sub>CN) δ 0.0-1.6 (br m, 8H), 3.08 (s, 12H), 4.55 (br q, *J* = 151 Hz, 1H); <sup>11</sup>B NMR (128 MHz, CD<sub>3</sub>CN) δ -25.0 (d, *J* = 135 Hz, 4B), -17.2 (d, *J* = 139 Hz, 4B), -13.0 (s, 1B), 21.3 (d, *J* = 150 Hz, 1B).

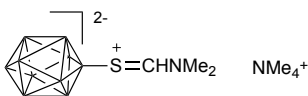

**Preparation of [closo-B<sub>10</sub>H<sub>9</sub>-1-SCHNMe<sub>2</sub>]<sup>2-</sup> [NMe<sub>4</sub>]<sup>+</sup> (7a[NMe<sub>4</sub>]).**<sup>7</sup> 1-Dinitrogen-closo-decaborate ([closo-B<sub>10</sub>H<sub>9</sub>N<sub>2</sub>]<sup>2-</sup> [NMe<sub>4</sub>]<sup>+</sup>, 6[NMe<sub>4</sub>], 9.88 g, 45 mmol) was heated with *N,N*-dimethylthioformamide (100 mL) at 110 °C for 24 hrs. Excess solvent was removed under reduced pressure and the viscous residue was dried under vacuum. The resulting crude product was dissolved in MeCN and quickly passed through a silica gel plug (5 cm). The plug was washed with a mixture of MeCN and CH<sub>2</sub>Cl<sub>2</sub> (1:1) and the first 100 mL of the intense red solution was evaporated. The residue was treated with benzene/CH<sub>2</sub>Cl<sub>2</sub> (1:1) and the resulting crystalline yellow mass was filtered and dried to give 9.00 g (71% yield) of 7a[NMe<sub>4</sub>] as a yellowish solid: <sup>1</sup>H NMR (400 MHz, CD<sub>3</sub>CN) δ -0.6-1.3 (br m, 9H), 3.08 (s, 12H), 3.45 (s, 3H), 3.52 (s, 3H), 9.83 (s, 1H); <sup>11</sup>B NMR (128 MHz, CD<sub>3</sub>CN) δ -28.0 (d, *J* = 132 Hz, 4B), -24.8 (d, *J* = 128 Hz, 4B), 2.6 (s, 1B), 4.4 (d, *J* = 137 Hz, 1B).

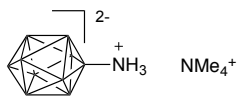

**Preparation of [closo-B<sub>10</sub>H<sub>9</sub>-1-NH<sub>3</sub>]<sup>2-</sup> [NMe<sub>4</sub>]<sup>+</sup> (7b[NMe<sub>4</sub>]).**<sup>8</sup> Tetramethylammonium 1-dinitrogen-closo-decaborate ([closo-B<sub>10</sub>H<sub>9</sub>N<sub>2</sub>]<sup>2-</sup> [NMe<sub>4</sub>]<sup>+</sup>, 6[NMe<sub>4</sub>], 567 mg, 2.59 mmol) was

placed in a steel bomb. The bomb and its contents were cooled to  $-35\text{ }^{\circ}\text{C}$ , liquid ammonia (50 mL) was added and the bomb was quickly sealed. The mixture was heated to  $130\text{--}135\text{ }^{\circ}\text{C}$  and the pressure rose slowly to about 1000 psi. After two hours at  $135\text{ }^{\circ}\text{C}$ , the bomb was cooled to  $-35\text{ }^{\circ}\text{C}$  and the remaining  $\text{NH}_3$  gas was vented. A powdery pink and white material was collected using MeOH, and the solvent was evaporated to give 610 mg of crude amine **7b**[NMe<sub>4</sub>] that was used without further purification: <sup>11</sup>B NMR (128 MHz, DMSO-*d*<sub>6</sub>)  $\delta$  -29.9 (d,  $J = 122\text{ Hz}$ , 4B), -27.8 (d,  $J = 120\text{ Hz}$ , 4B), -2.8 (d,  $J = 136\text{ Hz}$ , 1B), 7.0 (s, 1B).

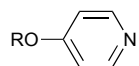

**4-Alkoxypyridine 10. A general procedure.**<sup>1</sup> To a suspension of NaH (0.63 g, mmol, 60% in oil, washed with hexane) in dry DMSO (10 mL), appropriate alcohol (15.40 mmol) was added dropwise. The mixture was stirred for 1 h, then crude 4-chloropyridine (3.00 g, 26.4 mmol) freshly liberated from its hydrochloride salt was added at once. A mixture was stirred overnight at rt, water was added, organic product was extracted into hexanes (**10a**, **10d**, **10e**) or AcOEt (**10b**, **10c**), extracts dried ( $\text{Na}_2\text{SO}_4$ ) and solvent was evaporated. The crude product was purified by short-path distillation (Kugel-rohr) yielding pyridine **10** as a colorless oil in a typical yield of 75-90%.

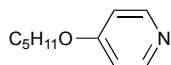

**4-Pentyloxypyridine (10a).**<sup>9</sup> Bp  $100\text{ }^{\circ}\text{C}/ 1\text{ mm Hg}$  (Kugel-Rohr); <sup>1</sup>H NMR (400 MHz,  $\text{CDCl}_3$ )  $\delta$  0.93 (t,  $J = 7.1\text{ Hz}$ , 3H), 1.35-1.50 (m, 4H), 1.80 (quin.  $J = 7.0\text{ Hz}$ , 2H), 3.99 (t,  $J = 6.6\text{ Hz}$ , 2H), 6.78 (d,  $J = 6.4\text{ Hz}$ , 2H), 8.40 (d,  $J = 6.4\text{ Hz}$ , 2H).

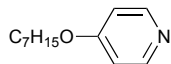

**4-Heptyloxy pyridine (10b).**<sup>3</sup> Bp 96-98 °C/ 0.2 mm Hg;<sup>3</sup> <sup>1</sup>H NMR (400 MHz, CDCl<sub>3</sub>) δ 0.89 (t, *J* = 6.8 Hz, 3H), 1.25-1.38 (m, 6H), 1.42-1.48 (m, 2H), 1.79 (quin. *J* = 7.0 Hz, 2H), 3.99 (t, *J* = 6.6 Hz, 2H), 6.79 (d, *J* = 6.4 Hz, 2H), 8.40 (d, *J* = 6.4 Hz, 2H); <sup>1</sup>H NMR (300 MHz, C<sub>6</sub>D<sub>6</sub>) δ 0.87 (t, *J* = 6.9 Hz, 3H), 1.09-1.26 (m, 8H), 1.48 (quin. *J* = 6.9 Hz, 2H), 3.45 (t, *J* = 6.5 Hz, 2H), 6.47 (d, *J* = 6.1 Hz, 2H), 8.43 (d, *J* = 6.2 Hz, 2H).

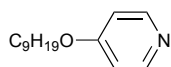

**4-Nonyloxy pyridine (10c).** Bp 125 °C/ 0.5 mm Hg; <sup>1</sup>H NMR (400 MHz, CDCl<sub>3</sub>) δ 0.88 (t, *J* = 6.8 Hz, 3H), 1.25-1.38 (m, 10H), 1.42-1.48 (m, 2H) 1.79 (quin. *J* = 7.0 Hz, 2H), 4.00 (t, *J* = 6.6 Hz, 2H), 6.79 (d, *J* = 6.4 Hz, 2H), 8.41 (d, *J* = 6.4 Hz, 2H). Anal. Calcd for C<sub>14</sub>H<sub>23</sub>NO: C, 75.97; H, 10.47; N, 6.33. Found: C, 75.75; H, 10.69; N, 6.21.

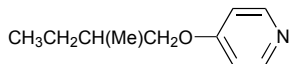

**(S)-4-(2-Methyl-1-butoxy)pyridine (10d).** Yield 92%; bp 110-113 °C/0.1 mm Hg (Kugel-Rohr): <sup>1</sup>H NMR (400 MHz, CDCl<sub>3</sub>) δ 0.95 (t, *J* = 7.5 Hz, 3H), 1.01 (d, *J* = 6.8 Hz, 3H), 1.22-1.34 (m, 1H), 1.50-1.61 (m, 1H), 1.87 (pseudo-octet, *J* = 6.6 Hz, 1H), 3.78 (dd, *J*<sub>1</sub> = 9.1 Hz, *J*<sub>2</sub> = 6.6 Hz, 1H), 3.85 (dd, *J*<sub>1</sub> = 9.1 Hz, *J*<sub>2</sub> = 6.0 Hz, 1H), 6.79 (d, *J* = 6.4 Hz, 2H), 8.40 (d, *J* = 6.4 Hz, 2H).

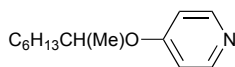

**(S)-2-Octyloxy pyridine (10e).**<sup>1</sup> Yield 73%; bp 150-160 °C/0.5 mm Hg (Kugel-Rohr): <sup>1</sup>H NMR (400 MHz, CDCl<sub>3</sub>) δ 0.88 (t, *J* = 6.7 Hz, 3H), 1.24-1.48 (m, 8H), 1.31 (d, *J* = 6.1 Hz, 3H), 1.54-1.64 (m, 1H), 1.69-1.82 (m, 1H), 4.44 (sext, *J* = 6.1 Hz, 1H), 6.76 (d, *J* = 6.4 Hz, 2H), 8.39

(d,  $J = 6.4$  Hz, 2H). Anal. Calcd for  $C_{13}H_{21}NO$ : C, 75.32; H, 10.21; N, 6.76. Found: C, 75.19; H, 10.20; N, 6.79.

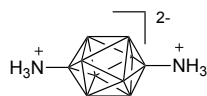

**1,10-Diammonio-closo-decaborane (13).**<sup>4</sup> It was obtained from bis-dinitrogen **12**<sup>4</sup> and  $NH_3$  as described for the preparation of **6[NMe<sub>4</sub>]** and used without further purification: <sup>11</sup>B NMR (128 MHz, DMSO-*d*<sub>6</sub>)  $\delta$  -29.1 (8B), 7.0 (2B).

## 2. Computational Details

Quantum-mechanical calculations were carried out with the B3LYP<sup>10,11</sup> method with 6-31G(d,p) basis set using Gaussian 09 package.<sup>12</sup> Geometry optimizations for unconstrained conformers of **1–3** in the most extended molecular shapes were undertaken using default convergence limits. The alkoxy and alkyl groups were set in all-*trans* conformation in the input structures. The former were set co-planar with the pyridine ring, while orientation of the pentyl substituent on the thiane and quinuclidine rings in the input structure was set according to conformational analysis of 1-ethyl derivatives of bicyclo[2.2.2]octane and cyclohexane. Vibrational frequencies were used to characterize the nature of the stationary points achieved with the DFT method, and to obtain thermodynamic parameters. Zero-point energy (ZPE) corrections were scaled by 0.9806.<sup>13</sup>

Electronic excitation energies were obtained at the B3LYP/6-31G(d,p)//B3LYP/6-31G(d,p) level using the time-dependent DFT calculations<sup>14</sup> supplied in the Gaussian package. Solvent effect on electronic excitations was included using the PCM model<sup>15</sup> [keywords: SCRF(PCM, Solvent=*name*)]. Frequency-dependent hyperpolarizabilities were obtained using Polar and

CPHF=RdFreq keywords.<sup>16</sup> The radius of the Onsager cavity  $a_0$  for the Lippert-Mataga calculations was obtained using VOLUME keyword.

The transition state structure for *cis*–*trans* isomerization of **2b** was located using the STQN method<sup>17</sup> requested with the QST3 keyword and default convergence criteria at the B3LYP/6-31G(d,p) level of theory and default convergence criteria. Final energy for the optimized structure was calculated with the B3LYP/6-31G(d,p) method and inclusion of solvation effects with the PCM model<sup>15</sup> [keywords: SCRF(PCM, Solvent=*name*)].

### 3. Equilibrium and kinetic data for **2b**.

In solution there are two conformers for each isomer **2b-trans** and **2b-cis** - a total of four species in equilibrium as shown in Figure S1. It is assumed that the higher intensity (lowfield) <sup>1</sup>H NMR signals (Figure 6 in the main text) are related to species **C'** and **T**, while low intensity signals (highfield) are ascribed to species **C** and **T'**.

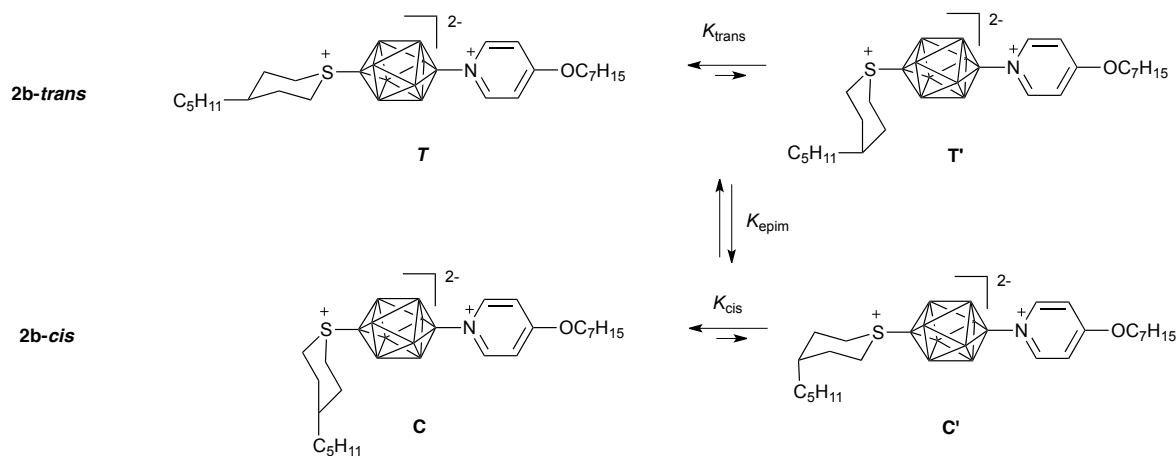

**Figure S1.** Isomer and conformer equilibrium for **2b**.

Therefore:

$$K_{obs} = \frac{C + T'}{C' + T}$$



It is assumed further that the  $C_5H_{11}$  and  $\{closo-B_{10}\}$  substituents are independent of each other do not affect each other's preference for either axial or equatorial position in **2b**. Consequently their preference can be described by equilibrium constant for monosubstituted thian:

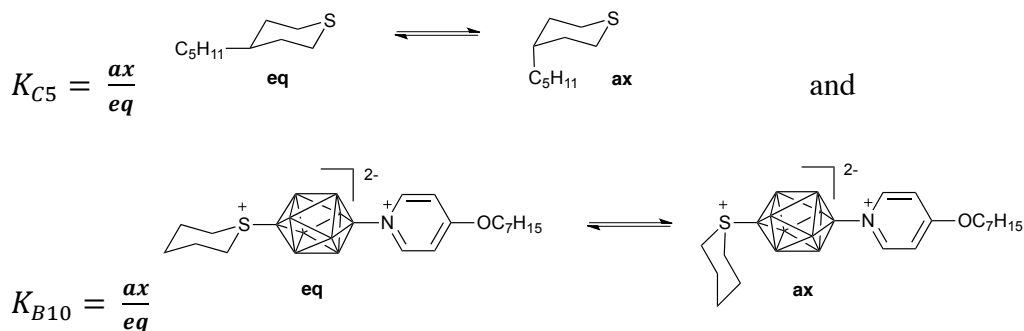

With these assumptions, it can be demonstrated that the observed equilibrium describes the conformational preference of the  $\{closo-B_{10}\}$  cluster and is related to the steric parameter  $A$  of the cluster.

$$K_{obs} = K_{B10}$$

Equilibrium constant  $K_{epi}$  for the isomerization process can be calculated from:

$$K_{epi} = \frac{C + C'}{T + T'} = \frac{K_{B10} + K_{C5}}{1 + K_{B10} \times K_{C5}}$$

For these calculations  $K_{C5}$  can be assumed to be the same as in ethylcyclohexane  $\Delta H = 1.60$  kcal/mol,  $\Delta S = -0.64$  cal/molK.<sup>18</sup>

**Table S1.** Equilibrium constant measurement for **2b** in toluene- $d_8$

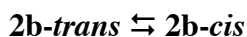

| T         | 323 K | 333 K | 343 K | 353 K | 363 K | 373 K |
|-----------|-------|-------|-------|-------|-------|-------|
| $K_{obs}$ | 0.292 | 0.306 | 0.321 | 0.330 | 0.356 | 0.363 |

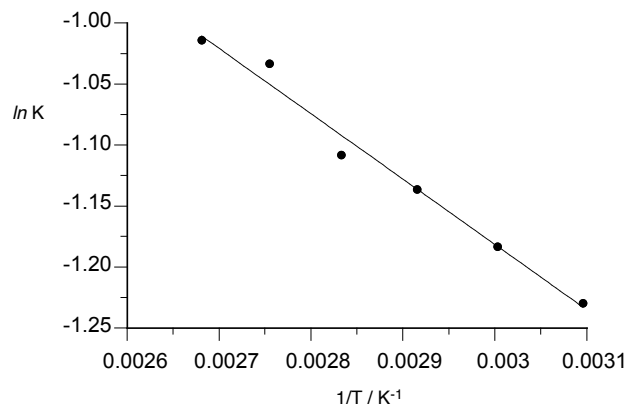

**Figure S2.** A plot of  $\ln K$  vs  $1/T$ .

$$\Delta H = +1.06 \pm 0.06 \text{ kcal/mol}$$

$$\Delta S = +0.8 \pm 0.2 \text{ cal/molK}$$

$$\Delta G_{298} = +0.82 \text{ kcal/mol}$$

$$R^2 = 0.98$$

**Table S2.** Equilibrium constants  $K$  extrapolated from data in Table S1.

| <b>2b-trans</b> $\rightleftharpoons$ <b>2b-cis</b> |       |       |       |       |       |       |
|----------------------------------------------------|-------|-------|-------|-------|-------|-------|
| T                                                  | 273 K | 278 K | 283 K | 288 K | 293 K | 298 K |
| K                                                  | 0.219 | 0.225 | 0.231 | 0.237 | 0.243 | 0.249 |

Rate constants  $k$  in Table S3 were obtained from a plot of  $\ln(\alpha_{\infty} - \alpha)$  vs  $t$  (Figure S3), where  $\alpha$  is the observed mole fraction of the *cis* isomer, and  $\alpha_{\infty}$  is the mole fraction of the *cis* isomer at infinite time. The latter was obtained from equilibrium constant  $K$  extrapolated from high temperature data shown in Table S1 to the given temperature  $T$  (Table S2).

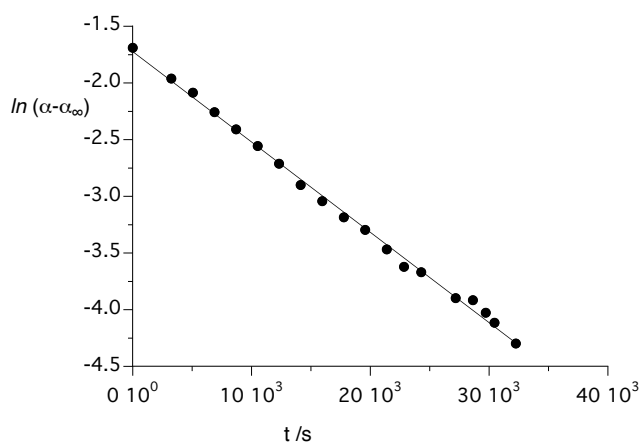

**Figure S3.** An example of first order kinetics for isomerization of **2b-trans** at 283 K. Rate  $k = 8.1 \times 10^{-5} \text{ s}^{-1}$

**Table S3.** Kinetic data for isomerization of **2b-trans** obtained by integration of  $^1\text{H}$  NMR signals and Arrhenius analysis

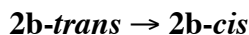

| $k \cdot 10^5 \text{ s}^{-1}$ |          |          |          |          |        | $E_a$    | $\ln A$  | $R^2$ |
|-------------------------------|----------|----------|----------|----------|--------|----------|----------|-------|
| 273 K                         | 278 K    | 283 K    | 288 K    | 293 K    | 298 K  | kcal/mol |          |       |
| 2.11±0.1                      | 4.38±0.1 | 8.12±0.1 | 20.7±0.2 | 40.3±0.3 | 86.7±2 | 24.1±0.6 | 33.7±1.2 | 0.998 |

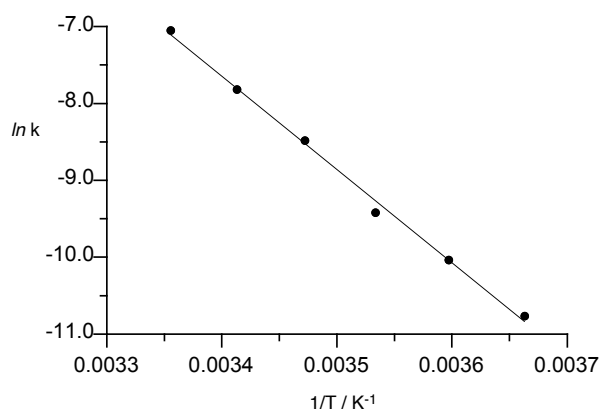

**Figure S4.** Arrhenius plot for interconversion of the  $\{closo\text{-B}_{10}\}$  cluster between axial and equatorial orientation in **2b**. Plot of data from Table S3.

Calculation of activation parameters:  $\Delta S^\ddagger = R \cdot [\ln A - \ln(ekT/h)]$ ,  $\Delta H^\ddagger = E_a - RT$

#### 4. Fluorescence quantum yield

Quantum yield  $\Phi_u$  for fluorescence of **2a** and **3b** was measured in MeCN and  $\text{CH}_2\text{Cl}_2$  (**2a**) using aqueous solution of quinine bisulfate in 0.1 N  $\text{H}_2\text{SO}_4$  as a reference. Both solutions, the unknown (**2a** and **3b**) and the reference were at concentrations so the optical density at around 325 nm did not exceed 0.1 (concentration of about  $2 \times 10^{-6}$  mol/L). A plot of the absorption spectra for the unknown and the reference in the same graph, gave the excitation wavelength as the crossing point for the two spectra (same optical density). Thus, the excitation wavelength for **2a** was  $\lambda_{\text{ex}} = 319$  nm in MeCN and 331 nm in  $\text{CH}_2\text{Cl}_2$ . For **3b**  $\lambda_{\text{ex}}$  was 329 nm in MeCN.

The resulting emission for the reference and the unknown were integrated over a range of about 300 nm. The quantum yield was calculated from the formula:<sup>19</sup>

$$\Phi_u = \frac{F_u n_u^2}{F_r n_r^2} \Phi_r$$

where  $\Phi_u$  is area of emission peak for the unknown,  $\Phi_r$  area of emission peak for a reference,  $n_u^2$  refractive index of the solvent for the unknown,  $n_r^2$  refractive index of the solvent for the reference;  $\Phi_r$  quantum yield for the reference (quinine bisulfate  $\Phi_r = 0.546$ )

## 5. Solvatochromic data

Experimental data for the position of the long wavelength absorption peak for selected compounds in different solvents is shown in Table S4 and theoretical values are listed in Table S5. A plot of absorption energy for **2b** and **3b** *vs* solvent parameter is shown in Figure S5, and contours of MOs involved in the cluster  $\rightarrow N_2$  excitation for **8a** are in Figure S6.

**Table S4.** Experimental solvent dependence of the cluster  $\rightarrow$ pyridine or cluster  $\rightarrow N_2$  ( $\pi$ - $\pi^*$ ) electronic excitation.

| solvent<br>compound | $\lambda_{\max}$ /nm |       |                                 |                                      |       |                       |       |
|---------------------|----------------------|-------|---------------------------------|--------------------------------------|-------|-----------------------|-------|
|                     | MeCN                 | Ether | CH <sub>2</sub> Cl <sub>2</sub> | ClCH <sub>2</sub> CH <sub>2</sub> Cl | THF   | (EtO) <sub>3</sub> PO | PrCN  |
| <b>2b</b>           | 300.8                | 321.8 | 308.0                           | 306.9                                | 314.2 | 306.5                 | 307.4 |
| <b>3b</b>           | 310.0                | 332.4 | 316.2                           | 317.3                                | 325.5 | 316.5                 | 315.9 |
| <b>8a</b>           | 252.0                | 258.4 | 257.1                           | 257.0                                | 257.7 | 254.5                 | 254.7 |
| <b>8b</b>           | 255.3                | 262.5 | 259.5                           | 259.4                                | 261.7 | –                     | 258.0 |
| $E_T(30)^a$         | 45.6                 | 34.5  | 40.7                            | 41.3                                 | 37.4  | 41.7                  | 42.5  |
| $E_T^N{}^b$         | 0.460                | 0.117 | 0.309                           | 0.327                                | 0.207 | 0.324                 | 0.370 |

<sup>a</sup> kcal/mol. <sup>b</sup>  $E_T^N$  normalized values (ref.<sup>20</sup>)

**Table S5.** Theoretical solvent dependence of the cluster→pyridine or cluster→N<sub>2</sub> (π-π\*) electronic excitation.<sup>a</sup>

| solvent<br>compound | $\lambda_{\max}$ /nm |       |                                 |                                     |       |        |
|---------------------|----------------------|-------|---------------------------------|-------------------------------------|-------|--------|
|                     | MeCN                 | Ether | CH <sub>2</sub> Cl <sub>2</sub> | CICH <sub>2</sub> CH <sub>2</sub> C | THF   | vacuum |
| <b>2b</b>           | 324.9                | 342.2 | 332.5                           | 331.5                               | 334.3 | 386.1  |
| <b>3b</b>           | 332.0                | 349.8 | 339.9                           | 338.9                               | 341.8 | 392.9  |
| <b>8a</b>           | 264.8                | 266.6 | 266.0                           | 266.0                               | 266.1 | 268.4  |
| <b>8b</b>           | 264.1                | 265.8 | 265.25                          | 265.25                              | 265.3 | 267.0  |

<sup>a</sup> TD-DFT data at the B3LYP/6-31G(d,p) // B3LYP/6-31G(d,p) level of theory using the PCM model.

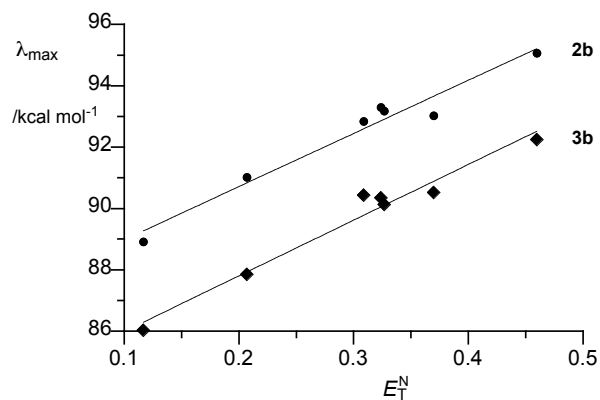

**Figure S5.** Dependence of absorption energy for **2b** and **3b** on solvent polarity  $E_T^N$ . Slope:  $17.3 \pm 1.6$  (**2b**) and  $18.1 \pm 1.5$  (**3b**),  $r = 0.98$ .

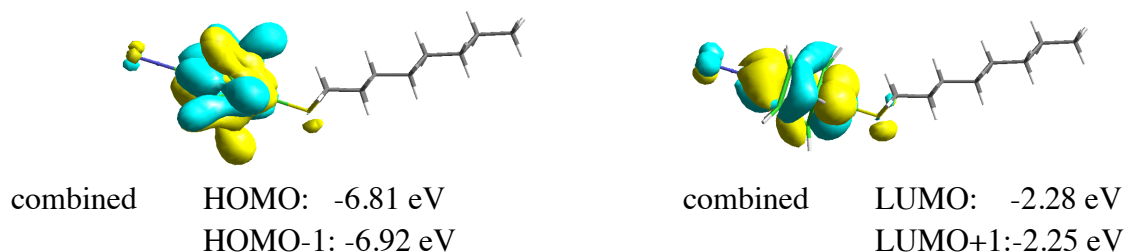

**Figure S6.** B3LYP/6-31G(d,p) derived contours and energies of frontier molecular orbitals for **8a** in MeCN dielectric medium.

## 6. Lippert-Mataga calculations

The change of the dipole moment upon excitation is calculated from the Lippert-Mataga relationship (eq 1):<sup>21</sup>

$$(v_{ab} - v_{fl}) = \frac{2(\mu_e - \mu_g)^2}{4\pi\epsilon_0 h c a_0^3} \Delta f + \text{const} \quad (\text{eq 1})$$

where

$v_{ab}$  – energy of maximum of absorption in  $\text{cm}^{-1}$

$v_{fl}$  – energy of maximum of fluorescence in  $\text{cm}^{-1}$

and solvent parameter  $\Delta f$  is given by equation 2:

$$\Delta f = \frac{\epsilon - 1}{2\epsilon + 1} - \frac{2n^2 - 1}{2n^2 + 1} \quad (\text{eq 2})$$

| <u>solvent</u>                       | <u>n</u> | <u>ε</u> | <u>Δf</u> |
|--------------------------------------|----------|----------|-----------|
| MeCN                                 | 1.3441   | 36.00    | 0.3046    |
| PrCN                                 | 1.3842   | 20.30    | 0.2744    |
| Et <sub>2</sub> O                    | 1.3524   | 4.34     | 0.1669    |
| THF                                  | 1.4072   | 7.58     | 0.2096    |
| (EtO) <sub>3</sub> PO                | 1.403    | 12.94    | 0.2480    |
| CH <sub>2</sub> Cl <sub>2</sub>      | 1.424    | 9.08     | 0.2184    |
| ClCH <sub>2</sub> CH <sub>2</sub> Cl | 1.445    | 10.37    | 0.2208    |
| DMSO                                 | 1.4793   | 46.45    | 0.2630    |

Thus, a plot of the difference between absorption and emission energies against solvent parameter  $\Delta f$  gives a slope expressed by eq 3 and in  $\text{cm}^{-1}$  units:

$$\text{slope} = \frac{2(\mu_e - \mu_g)^2}{4\pi\epsilon_0 h c a_0^3} \quad (\text{eq 3})$$

The change of the dipole moment  $\Delta\mu$  is then calculated from eq 4 in which the slope is converted to  $\text{m}^{-1}$  units by multiplying by a factor of 100. The resulting  $\Delta\mu$  value is in units Cm and is divided by  $3.333564 \times 10^{-30}$  to convert to Debye:

$$\Delta\mu = \mu_e - \mu_g = \sqrt{100 \times \text{slope} \times 2\pi\epsilon_0 h c a_0^3} \quad (\text{eq 4})$$

$$4\pi\epsilon_0 = 1.114 \times 10^{-10} \text{ A s (V m)}^{-1}$$

$$h = 6.6261 \times 10^{-34} \text{ J s}$$

$$c = 2.997 \times 10^8 \text{ m s}^{-1}$$

$$a_0 = 6.26 \times 10^{-10} \text{ m} \quad (\text{cavity radius calculated for } \mathbf{2b} \text{ with the DFT method using VOLUME keyword})$$

## 7. Calculations for the nematic phase using the Maier-Meier relationship

For complete background and procedures of the calculations see ESI in ref. <sup>22</sup> The calculated values for the Krirkwood factor and order parameter were substituted into the original expressions for  $\Delta\epsilon$  and  $\epsilon_{\perp}$  to verify the correctness of the calculations.

Details of the calculations and assumptions:

Measurement temperature:  $T = 403 \text{ K}$

Ratio of **2b-trans** to **2b-cis** at 403 K:  $K_{403} = 2.760$  (extrapolated from data in Table S1).

Assumptions:

- Only two forms of **2b** are present in the material designated as **2b-trans** and **2b-cis** (**T** and **C** in Figure S1).
- Density of the liquid is  $1000 \text{ kg}\cdot\text{m}^{-3}$ .
- Static permittivity  $\epsilon_s$  for calculations of field parameters  $F$  and  $h$  was obtained as  $\epsilon_s = (\epsilon_{\parallel} + 2 \epsilon_{\perp})/3$

Dipole moment and polarizability computational results for **2b**.

Dipole moments (D) and polarizability (au) at the B3LYP/6-31G(d,p) level of theory (full geometry optimization).  $1\text{\AA}^3 = 0.1482 \text{ au}$ . Summary of results is given in Table S6

**2b-trans:**

Dipole moment (field-independent basis, Debye) in vacuum:

X= 3.7325    Y= 2.0669    Z= 0.7311    Tot= 4.3288

Dipole moment (field-independent basis, Debye) in CH<sub>2</sub>Cl<sub>2</sub>:

X= 4.1153    Y= 2.4065    Z= 0.9172    Tot= 4.8547

Exact polarizability: 657.085    12.240    317.015    0.029    6.547    288.440

Diagonalized: 657.53,    318.04,    286.99

**2b-cis:**

Dipole moment (field-independent basis, Debye) in vacuum:

X= -4.5006    Y= 4.3133    Z= 0.5000    Tot= 6.2538

Dipole moment (field-independent basis, Debye) in CH<sub>2</sub>Cl<sub>2</sub>:

X= -4.5096    Y= 5.1567    Z= 0.6792    Tot= 6.8840

Exact polarizability: 601.511    -8.726    354.392    9.003    7.757    289.190

Diagonalized: 600.84,    355.65,    288.60

**Table S6.** Calculated molecular parameters for **2b** in vacuum.<sup>a</sup>

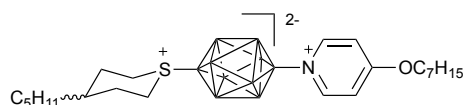

|                         | $\mu_{  } / \text{D}$ | $\mu_{\perp} / \text{D}$ | $\mu / \text{D}$ | $\alpha_{  } / \text{\AA}^3$ | $\alpha_{\perp} / \text{\AA}^3$ | $\Delta\alpha / \text{\AA}^3$ | $\alpha_{\text{avg}} / \text{\AA}^3$ |
|-------------------------|-----------------------|--------------------------|------------------|------------------------------|---------------------------------|-------------------------------|--------------------------------------|
| <i>trans</i>            | 3.73                  | 2.19                     | 4.33             | 97.42                        | 44.83                           | 52.58                         | 62.36                                |
| <i>cis</i>              | 4.5                   | 4.34                     | 6.25             | 89.04                        | 47.74                           | 41.31                         | 61.51                                |
| <i>mix</i> <sup>b</sup> | 3.93                  | 2.76                     | 4.81             | 95.19                        | 45.61                           | 49.58                         | 62.13                                |

<sup>a</sup> Obtained at the B3LYP/6-31G(d,p) level of theory. Polarizability units were converted from au to  $\text{\AA}^3$  using the factor 0.1482. <sup>b</sup> **2b-trans** to **2b-cis** in a ratio of 2.760.



## 8. Crystal Structure Data

**Table S7.** Crystal Data and Summary of X-ray Data Collection

| compound                                                            | <b>8b</b>                                                      | <b>8a</b>                                                        | <b>2b</b>                                             |
|---------------------------------------------------------------------|----------------------------------------------------------------|------------------------------------------------------------------|-------------------------------------------------------|
| formula                                                             | C <sub>12</sub> H <sub>31</sub> B <sub>10</sub> N <sub>3</sub> | C <sub>10</sub> H <sub>28</sub> B <sub>10</sub> N <sub>2</sub> S | C <sub>22</sub> H <sub>47</sub> B <sub>10</sub> NOS   |
| fw                                                                  | 325.50                                                         | 316.52                                                           | 481.77                                                |
| space group                                                         | P2 <sub>1</sub> /c                                             | P2 <sub>1</sub> /n                                               | P-1                                                   |
| <i>a</i> , Å                                                        | 11.1832 (7)                                                    | 10.7989 (2)                                                      | 9.7645(12)                                            |
| <i>b</i> , Å                                                        | 11.4422 (7)                                                    | 21.0221 (4)                                                      | 15.716(2)                                             |
| <i>c</i> , Å                                                        | 16.2022 (10)                                                   | 17.1320 (4)                                                      | 20.148(3)                                             |
| α, °                                                                | 90                                                             | 90                                                               | 77.516(2)                                             |
| β, °                                                                | 109.272 (1)                                                    | 99.468 (1)                                                       | 83.823(2)                                             |
| γ, °                                                                | 90                                                             | 90                                                               | 78.246(2)                                             |
| <i>V</i> , Å <sup>3</sup>                                           | 1957.1 (2)                                                     | 3836.25 (14)                                                     | 2948.9(6)                                             |
| <i>Z</i>                                                            | 4                                                              | 8                                                                | 4                                                     |
| <i>D</i> (calcd), g/cm <sup>3</sup>                                 | 1.105                                                          | 1.096                                                            | 1.085                                                 |
| tot. reflcns                                                        | 9435                                                           | 25968                                                            | 22591                                                 |
| unique reflcns                                                      | 3414(R <sub>int</sub> = 0.0312)                                | 6707 (R <sub>int</sub> = 0.0662)                                 | 10295 (R <sub>int</sub> = 0.0293)                     |
| no. with <i>I</i> > 2.0σ( <i>I</i> )                                | 2458                                                           | 4514                                                             | 6251                                                  |
| <i>R</i> <sub>1</sub>                                               | 0.0578                                                         | 0.0594                                                           | 0.0905                                                |
| <i>wR</i> <sub>2</sub>                                              | 0.1296                                                         | 0.1066                                                           | 0.2374                                                |
| goodness of fit on <i>F</i> <sup>2</sup>                            | 1.054                                                          | 1.046                                                            | 1.049                                                 |
| max Δ/σ in final cycle                                              |                                                                |                                                                  |                                                       |
| max/min peak<br>(final diff peak) (e <sup>-</sup> /Å <sup>3</sup> ) | 0.514<br>and<br>-0.209 e <sup>-</sup> /Å <sup>3</sup>          | 0.238<br>and<br>-0.210 e <sup>-</sup> /Å <sup>3</sup>            | 0.865<br>and<br>-0.406 e <sup>-</sup> /Å <sup>3</sup> |

## 9. Archive files for DFT geometry optimizations

### 2a-trans

```
1\1\GINC-OCTOPUS\FOpt\RB3LYP\6-31G(d,p)\C20H43B10N1O1S1\PIOTR\18-Sep-2
012\0\#P B3LYP/6-31G(d,p) FOpt fcheck Geom(nodistance, noangle) #P fr
eq(noraman, readIso) Volume\1-(4-C5H11O-Pyridine)-10-(4-C5H11-ThiaCyc
lohexane)decaborane, C1 symm\0,1\B,-0.0359668761,-0.0108229403,0.0227
420263\B,0.0577032209,0.0336127611,1.6977977567\B,1.5445150585,-0.0486
815514,0.5917066939\B,-0.7385524321,-1.362783385,0.7335959394\B,1.5921
78655,-0.7179549975,2.2614223982\B,0.7472551288,-1.4423724313,-0.37335
12401\B,1.4686284446,-2.3929291134,2.2165891301\B,-0.0251128341,-1.648
9500673,2.3696188496\B,2.0896770839,-1.7657124366,0.7928955304\B,0.470
3002512,-2.6888427413,0.8969207584\N,-0.6801943509,1.0015380568,-0.923
2343997\O,-2.3730572924,3.8102088065,-3.4374302972\S,2.2689524103,-3.6
471640616,3.3578692282\C,-1.8488035764,2.8473174918,-2.6629041135\C,-1
.9408131342,1.4683540831,-2.9091959369\C,-1.3476220122,0.5876648672,-2
.0218677647\C,-0.5896842077,2.334276336,-0.6798162174\C,-1.1537801623,
3.2708460798,-1.5158877428\C,-3.0938438443,3.4441034799,-4.6289312757\
C,1.7407122965,-3.1514074299,5.0513076489\C,2.6181121905,-3.8055933159
,6.1199559321\C,4.1035687263,-3.3982918346,6.0490210666\C,4.7189154829
,-3.7566768641,4.6808615748\C,4.0236573229,-3.1023406413,3.4865739577\
C,-3.5608945996,4.7270976351,-5.2975371928\C,-4.3498374994,4.459008128
8,-6.5853720297\C,-4.8281504487,5.7443743936,-7.2726532711\C,-5.615782
3528,5.4802037389,-8.5587789375\C,4.93450384,-4.0256334874,7.184926470
3\C,4.5562596253,-3.5795039293,8.6041061225\C,5.4918163058,-4.14573783
27,9.6801387617\C,5.1165941535,-3.7176708117,11.1042398203\C,6.0553289
101,-4.2852451494,12.1729102605\H,-5.9432158819,6.4153903039,-9.023374
1401\H,-1.066897352,4.3285315783,-1.2993284935\H,-0.0466561772,2.60423
57756,0.2164090538\H,-1.3827407164,-0.4848105081,-2.1639261347\H,-2.45
9398437,1.0698282199,-3.7706184361\H,-2.4322487904,2.8710105375,-5.291
7278226\H,-3.9456945045,2.8073049331,-4.3564903443\H,-0.4271779238,0.9
444839146,2.3028750218\H,2.3210058959,0.7943746654,0.2521896575\H,-1.8
893430498,-1.6094960611,0.5245524386\H,0.8577567376,-1.7604555556,-1.5
213321419\H,2.2503418635,-0.1765877144,3.103193479\H,4.006468563,-2.01
12748898,3.5533604448\H,4.4806075507,-3.3790804219,2.5343340862\H,5.76
91385696,-3.43943655,4.6632097053\H,4.7235207761,-4.8477647805,4.55471
54494\H,4.1536328933,-2.3034835976,6.157920719\H,2.5344613722,-4.89882
```

31669,6.0505893623\H,2.2011867472,-3.5235172884,7.0929647843\H,0.69511  
87752,-3.4562552211,5.1271955853\H,1.7805783098,-2.0592478007,5.085547  
1042\H,-0.7397896359,-1.8787364619,3.2993251786\H,3.1653183707,-2.0929  
064691,0.3879180904\H,0.1826936365,-3.8062511311,0.5927852107\H,-2.684  
1630079,5.3490548545,-5.5142784785\H,-4.1785848952,5.2883769146,-4.586  
2447273\H,-3.7274723041,3.8849952477,-7.2863316807\H,-5.2191312364,3.8  
253132051,-6.3598863075\H,-5.449561222,6.3175735026,-6.5718993172\H,-3  
.9595211899,6.3775989274,-7.4967820905\H,-5.0078356591,4.9396469238,-9  
.2928835869\H,-6.5089494166,4.8770505574,-8.3608320945\H,5.99121466,-3  
.7790508168,7.0125729599\H,4.8670084129,-5.1213647668,7.1163728632\H,4  
.5684471616,-2.4813787244,8.6546177957\H,3.5274856383,-3.8839449651,8.  
8362821913\H,5.4918494114,-5.2435819401,9.6205325908\H,6.5236827825,-3  
.8317493641,9.4673785116\H,4.0861745732,-4.0334740159,11.316797959\H,5  
.1150570535,-2.6208285306,11.163434452\H,5.7608254997,-3.9622604112,13  
.1765838219\H,6.0519670631,-5.3811130371,12.1622050082\H,7.0879945986,  
-3.9574297081,12.0081107638\\Version=EM64L-G09RevA.02\State=1-A\HF=-15  
64.9416509\RMSD=3.924e-09\RMSF=3.220e-06\Dipole=-0.4825318,1.4192747,-  
0.7319907\Quadrupole=-10.5679047,-10.7022689,21.2701737,-22.5376091,35  
.7192929,-34.8271274\PG=C01 [X(C20H43B10N1O1S1)]\\

## 2b-trans

1\1\GINC-OCTOPUS\FOpt\RB3LYP\6-31G(d,p)\C22H47B10N1O1S1\PIOTR\18-Sep-2  
012\0\#P B3LYP/6-31G(d,p) FOpt fcheck Geom(nodistance, noangle) freq(  
noraman, readIso)\1-(4-C7H15O-Pyridine)-10-(4-C5H11-ThiaCyclohexane)d  
ecaborane, C1 symm\0,1\B,-0.047534559,-0.0161657663,0.026843241\B,0.0  
484219587,0.029748338,1.7017566737\B,1.5338070143,-0.0501703059,0.5936  
715605\B,-0.7461243848,-1.3691124726,0.7396625153\B,1.5854442853,-0.71  
80000807,2.2638181603\B,0.738407831,-1.4462273663,-0.3692414673\B,1.46  
54517474,-2.3932354646,2.2204464945\B,-0.0297774093,-1.6524628656,2.37  
49532125\B,2.0830945724,-1.7657789173,0.7953508187\B,0.4659394593,-2.6  
923351868,0.9023847851\N,-0.6949381202,0.9940314298,-0.919295186\O,-2.  
3955557033,3.7970171226,-3.4344993753\S,2.2694034016,-3.6453703362,3.3  
613063802\C,-1.868804507,2.835891225,-2.6596208705\C,-1.9593326168,1.4  
564540281,-2.9039113135\C,-1.3635622916,0.5777834053,-2.0163228824\C,-  
0.6057517635,2.3272194629,-0.6778822138\C,-1.1724107171,3.2618860602,-  
1.5143283343\C,-3.1191878847,3.4286808937,-4.623709534\C,1.7455575162,

-3.1475676795,5.0554890952\C,2.6256160636,-3.8007314807,6.1225220324\C  
,4.1109611779,-3.393642699,6.0475786281\C,4.7227533632,-3.7528693774,4  
.6780332938\C,4.0242199606,-3.0997360956,3.4849647038\C,-3.5903752241,  
4.7105568713,-5.2915968183\C,-4.3847209286,4.4406685394,-6.5759155584\  
C,-4.8670016714,5.7256331138,-7.2608844856\C,-5.66564353,5.4701366433,  
-8.5444048795\C,-6.1498205649,6.754633247,-9.2284237872\C,-6.946365348  
,6.4932836155,-10.5099836328\C,4.9444237481,-4.0206084875,7.1818532838  
\C,4.5694309858,-3.5734700624,8.6015910591\C,5.5047836038,-4.142295970  
7,9.6764050483\C,5.1327846099,-3.7130009831,11.1009825565\C,6.07082491  
24,-4.2838428557,12.1685128497\H,-1.0865399061,4.3199858018,-1.2993969  
298\H,-0.0615290949,2.5991730072,0.2170145944\H,-1.397409232,-0.494924  
2452,-2.1569179402\H,-2.4786128871,1.0561265579,-3.7640833281\H,-2.458  
5161822,2.8562265315,-5.2879643953\H,-3.9691404194,2.790650076,-4.3482  
426153\H,-0.4374986533,0.9401119242,2.3067686144\H,2.307802725,0.79448  
0361,0.2523717907\H,-1.8966268171,-1.618736906,0.5324957934\H,0.848017  
8384,-1.7649832261,-1.5171080811\H,2.2435399151,-0.1744266213,3.104215  
488\H,4.0068137776,-2.008601752,3.5507489874\H,4.4788434142,-3.3771467  
681,2.5318154271\H,5.7728464425,-3.4353963118,4.657380749\H,4.72727973  
65,-4.8440451907,4.552684095\H,4.1614610881,-2.2987910423,6.1557733543  
\H,2.5417496774,-4.8940245078,6.0543913522\H,2.2112078533,-3.517779508  
3,7.0963375078\H,0.7001176482,-3.4521772787,5.1344163881\H,1.785641195  
9,-2.0553733531,5.0883739567\H,-0.74274107,-1.8832283768,3.3057523973\  
H,3.1588892429,-2.0910370571,0.3891497492\H,0.1803559357,-3.8106118364  
,0.5995123469\H,-2.7152582492,5.3333082651,-5.5124390009\H,-4.20561348  
18,5.271703311,-4.5781051547\H,-3.764464272,3.8665867598,-7.2784781307  
\H,-5.2518232366,3.8060009748,-6.3453146468\H,-5.4841484956,6.30061161  
89,-6.5564147657\H,-3.9995600529,6.3596457048,-7.4916790344\H,-5.04814  
06849,4.8952520954,-9.2493403786\H,-6.5322824389,4.8343192812,-8.31343  
33034\H,-5.2837095031,7.3898593322,-9.4583828713\H,-6.7671218616,7.328  
2112155,-8.5237888602\H,-7.2778779638,7.4284746321,-10.9722930848\H,-6  
.3433716491,5.9531135468,-11.2486213872\H,-7.8376887495,5.8889186574,-  
10.3068277897\H,6.0008540362,-3.7746530372,7.0069298199\H,4.8761936114  
, -5.1163425965,7.1140784561\H,4.5846551777,-2.4753786228,8.6520439039\  
H,3.5400637835,-3.8750208551,8.835046408\H,5.5014783376,-5.2401401659,  
9.6169248279\H,6.5373061165,-3.8314128803,9.462251555\H,4.1015618159,-  
4.0253019791,11.3147954531\H,5.1350567124,-2.6161641655,11.1602347762\  
\

H, 5.7785386715, -3.9599821854, 13.1725520838\H, 6.0637653604, -5.379693876  
3, 12.1576982486\H, 7.1044277998, -3.959519851, 12.0026305202\\Version=EM6  
4L-G09RevA.02\State=1-A\HF=-1643.574709\RMSD=5.003e-09\RMSF=1.870e-06\  
Dipole=-0.5053525, 1.4358893, -0.7637355\Quadrupole=-9.5525007, -11.74905  
75, 21.3015582, -21.3716196, 35.0807403, -32.8396322\PG=C01 [X(C22H47B10N1  
O1S1)]\@

## 2b-cis

1\1\GINC-OCTOPUS\FOpt\RB3LYP\6-31G(d,p)\C22H47B10N1O1S1\PIOTR\20-Sep-2  
012\0\#P B3LYP/6-31G(d,p) FOpt fcheck Geom(nodistance, noangle) freq(  
noraman, readIso)\cis-1-(4-C7H15O-Pyridine)-10-(4-C5H11-ThiaCyclohexa  
ne)decaborane, C1 symm\0,1\B,-0.1453344695,-0.0336417222,-0.173597816  
8\B,-0.1699188418,-0.1358288772,1.5011792644\B,1.3897828785,-0.0084617  
065,0.5087387689\B,-0.7863584962,-1.4911345403,0.3660684152\B,1.375223  
2784,-0.821861081,2.1119238275\B,0.7753656258,-1.3618845239,-0.6278699  
242\B,1.390198129,-2.4992826334,1.9191026107\B,-0.162609362,-1.8727933  
494,2.0234468131\B,2.0566961859,-1.6906725472,0.6094363277\B,0.5064205  
927,-2.7340532613,0.5053818109\N,-0.7968688312,1.0164054225,-1.0729886  
452\O,-2.4935480793,3.9388881299,-3.4509637321\S,2.2755273242,-3.61826  
03436,3.1410819463\C,-1.9604078498,2.9420653686,-2.727479171\C,-1.8856  
676809,1.5988825682,-3.1287592269\C,-1.301232637,0.6765847869,-2.27868  
9136\C,-0.8710454816,2.3136694118,-0.6781794301\C,-1.4382370198,3.2876  
099867,-1.4680873391\C,-3.0243607193,3.657200654,-4.7596256033\C,1.049  
8397771,-4.8527724251,3.7537329532\C,0.5470686962,-5.8280277196,2.6906  
475295\C,1.660905366,-6.6505211045,2.0139378398\C,2.6496549707,-5.7274  
041703,1.275229931\C,3.3821211007,-4.7357039418,2.1762646833\C,-3.5272  
436735,4.9668576975,-5.345402645\C,-4.1008202742,4.7898008032,-6.75730  
01416\C,-4.6122212068,6.1026417473,-7.3636949445\C,-5.178423884,5.9398  
620252,-8.7792768746\C,-5.6906808588,7.2515048721,-9.3870650242\C,-6.2  
532431865,7.081926978,-10.8013181144\C,1.0925054738,-7.7010502591,1.03  
99941503\C,0.2748332203,-8.8257736365,1.6895902864\C,-0.1785360592,-9.  
894346871,0.6865654763\C,-0.9954051757,-11.0251798375,1.3235427689\C,-  
1.444003967,-12.0885207407,0.3167882715\H,-1.483328322,4.3157992655,-1  
.1305614312\H,-0.4556766443,2.5230057327,0.2988822312\H,-1.211314399,-  
0.3701914738,-2.5391133944\H,-2.268947868,1.2599353306,-4.0815924736\H  
, -2.2339551101,3.2227552467,-5.385660437\H,-3.8374831774,2.9246529105,

-4.6720172148\H,-0.7657518656,0.6783013827,2.1436785759\H,2.1176213731  
,0.9157858364,0.3001341065\H,-1.8954560708,-1.8063914162,0.0508411725\  
H,0.992440866,-1.5732465237,-1.7854709749\H,1.930561691,-0.3299236576,  
3.0463815688\H,4.0017601191,-5.2423080924,2.9239696747\H,4.0152420131,  
-4.054941086,1.6028471919\H,3.4167202032,-6.3365553161,0.7793758257\H,  
2.1215198719,-5.1756758842,0.4914865012\H,2.2173814432,-7.187223928,2.  
8010182999\H,-0.0119294523,-5.2730326415,1.9302450525\H,-0.1642749051,  
-6.4959075905,3.1902495431\H,0.239717094,-4.2449801966,4.1625419764\H,  
1.548947683,-5.3704569377,4.5799291895\H,-0.9240416187,-2.2389310617,2  
.8694916901\H,3.1784947459,-1.903636028,0.2546978701\H,0.3060588127,-3  
.8216307874,0.0532904655\H,-2.6979835015,5.6840637212,-5.3625814028\H,  
-4.2904837918,5.3818694238,-4.6764431052\H,-3.3308068513,4.3630570945,  
-7.4151928492\H,-4.9207359273,4.0583547553,-6.7326598746\H,-5.38563220  
07,6.5268919826,-6.7083574475\H,-3.7937427692,6.8357716267,-7.38119684  
13\H,-4.4039493649,5.51547384,-9.4340735639\H,-5.9959167494,5.20492292  
18,-8.76216992\H,-4.8736551931,7.9854998718,-9.4031978937\H,-6.4647493  
992,7.6747596718,-8.7326710031\H,-6.6101583012,8.0340259739,-11.206664  
903\H,-5.4915869307,6.6935351863,-11.4868335911\H,-7.0946739418,6.3798  
996805,-10.8118073891\H,1.9325458804,-8.1527410549,0.4941905409\H,0.48  
0202981,-7.1911149648,0.2831466214\H,0.8751275141,-9.301725832,2.47868  
71723\H,-0.611347259,-8.412613094,2.1883199946\H,-0.7743453959,-9.4189  
231599,-0.1055143924\H,0.7025945366,-10.3213013382,0.1864364881\H,-1.8  
764467715,-10.5982809561,1.8217723184\H,-0.3999984976,-11.4992124709,2  
.1158929948\H,-2.0232422617,-12.880729317,0.8020704605\H,-2.0714899154  
, -11.6512126196,-0.468072074\H,-0.5838042379,-12.5584591868,-0.1734772  
557\\Version=EM64L-G09RevA.02\State=1-A\HF=-1643.5733478\RMSD=8.613e-0  
9\RMSF=3.208e-06\Dipole=-1.2541606,0.2941829,-2.0962434\Quadrupole=-16  
.4967481,19.9995364,-3.5027883,-23.9589024,14.0121515,-34.3110367\PG=C  
01 [X(C22H47B10N1O1S1)]\@

## 2b-TS

1\1\GINC-OCTOPUS\FTS\RB3LYP\6-31G(d,p)\C22H47B10N1O1S1\PIOTR\31-Aug-20  
11\0\#\#P B3LYP/6-31G(d,p) FOpt(QST3, CalcFC) fcheck Geom(nodistance, n  
oangle) #P freq(noraman, readIso)\TS 1-(4-C7H15O-Pyridine)-10-(4-C5H1  
1-ThiaCyclohexane)decaborane\0,1\B,0.8507801191,0.2418277792,0.147498  
5473\B,-0.163730319,0.9875667066,1.263897722\B,0.0344745063,-0.8498759

802, 1.125836235\B, -0.388768008, 1.0960118874, -0.5956296584\B, -1.4803396  
316, -0.1255328285, 1.7530525814\B, -0.1925359071, -0.7412876755, -0.734624  
2701\B, -2.6644549228, -0.1664345305, 0.5513341092\B, -1.8063598617, 1.2582  
738887, 0.5321365303\B, -1.5249117544, -1.3591981585, 0.3388709402\B, -1.80  
10958243, 0.0317709333, -0.8862630078\N, 2.3595477792, 0.4219679234, -0.024  
1949155\O, 6.4212818506, 1.0205461236, -0.5073292039\S, -4.5219984481, -0.3  
794193143, 0.7610578512\C, 5.1162743486, 0.7582327153, -0.3312244775\C, 4.5  
838919514, -0.468747452, 0.0943801379\C, 3.2124912321, -0.5929976514, 0.234  
1364936\C, 2.8703945141, 1.610618041, -0.4380490588\C, 4.2223972437, 1.8101  
696149, -0.5993642721\C, 7.3945968869, -0.00093355, -0.2218770947\C, -5.765  
6233446, 0.9437100062, 0.9229493401\C, -6.9700179503, 0.6777940997, 0.01443  
68717\C, -7.6459123482, -0.6943148194, 0.2308895156\C, -6.6892367337, -1.86  
08567541, -0.1036403242\C, -5.4501743446, -1.9483004347, 0.7912309519\C, 8.  
76918365, 0.586497482, -0.4997078803\C, 9.9021487797, -0.3998889764, -0.189  
7298251\C, 11.2926101381, 0.1803172386, -0.4777587339\C, 12.4381816719, -0.  
7820954017, -0.1435202896\C, 13.8275347862, -0.2031394728, -0.4379363949\C  
, 14.9687174277, -1.1635731609, -0.091042757\C, -8.9412095936, -0.828406202  
9, -0.5953749889\C, -10.0883231043, 0.1057489519, -0.1863953907\C, -11.3750  
779135, -0.1461249309, -0.9834563777\C, -12.5350863571, 0.7734536736, -0.58  
28768312\C, -13.8145209134, 0.5136873108, -1.3836839759\H, 4.6032601865, 2.  
7687974719, -0.9297806621\H, 2.1381228737, 2.382295898, -0.6367335867\H, 2.  
7475843726, -1.5119681165, 0.5677529381\H, 5.2096343646, -1.3218497349, 0.3  
190938507\H, 7.3004791912, -0.3080282907, 0.8281202483\H, 7.2019678863, -0.  
8761796991, -0.8561634173\H, 0.2879642875, 1.7735769536, 2.0416678317\H, 0.  
64213693, -1.6320475598, 1.7981144227\H, -0.1389343097, 1.9784156294, -1.36  
50539202\H, 0.2387956157, -1.4245422751, -1.6145531759\H, -1.7893713568, -0  
.243810576, 2.8990184797\H, -5.7140017066, -2.17300221, 1.8289756157\H, -4.  
7372524155, -2.6987936133, 0.4427041549\H, -7.2318107533, -2.8095647141, -0  
.0022759908\H, -6.3708568782, -1.7836692777, -1.1503093429\H, -7.916183128  
6, -0.7759545013, 1.2965509025\H, -6.6574372997, 0.7645857629, -1.033438665  
4\H, -7.6931745214, 1.4796038386, 0.2017537716\H, -5.2332663886, 1.85714597  
79, 0.6487295862\H, -6.0588564799, 1.0137556237, 1.9746350032\H, -2.3408950  
663, 2.3196026968, 0.6599486562\H, -1.8191503381, -2.5171593935, 0.30566009  
78\H, -2.3778875802, 0.0472358829, -1.9303442526\H, 8.8872035435, 1.4958787  
467, 0.1016269878\H, 8.8130450194, 0.8956069279, -1.5509350201\H, 9.8468585  
728, -0.7013047295, 0.8657269491\H, 9.7639994304, -1.3184741321, -0.7771547

371\H,11.3528857079,0.4650064396,-1.5374968291\H,11.4210514427,1.11028  
55354,0.0936615609\H,12.3799036918,-1.0613066366,0.9182714519\H,12.307  
6495946,-1.7157552123,-0.7092320916\H,13.9542698817,0.7336089173,0.121  
5797087\H,13.8878410258,0.0687106932,-1.5004759189\H,15.9449386566,-0.  
7214077349,-0.3140298637\H,14.9577208167,-1.4248580794,0.9732031717\H,  
14.8889943081,-2.0967659123,-0.6601103691\H,-9.2942141025,-1.865397350  
2,-0.5128139893\H,-8.7046266116,-0.6757532705,-1.6582638161\H,-10.2953  
946705,-0.022461609,0.885733443\H,-9.7930533331,1.1549031662,-0.316825  
8752\H,-11.1676243768,-0.0214481828,-2.0557914457\H,-11.6826659841,-1.  
1937678504,-0.8551941141\H,-12.2282778027,1.8202670914,-0.7121029558\H  
, -12.7421863839,0.6485788922,0.4886622743\H,-14.6230075744,1.184098255  
2,-1.0750804758\H,-13.6484347798,0.6650244685,-2.4562530116\H,-14.1655  
83163,-0.5154172888,-1.2468136786\\Version=EM64L-G09RevA.02\State=1-A\  
HF=-1643.5393698\RMSD=4.594e-09\RMSF=1.905e-06\Dipole=1.0449802,-0.338  
2812,-0.1650651\Quadrupole=69.4291286,-29.8751832,-39.5539454,2.467891  
5,-4.994366,-2.1196944\PG=C01 [X(C22H47B10N1O1S1)]\\@

### 3b

#P B3LYP/6-31G(d,p) FOpt fcheck Geom(nodistance, noangle) freq(no  
raman, readIso)\1-(4-C7H15O-Pyridine)-10-(4-C5H11-Quinuclidine)decabo  
rane, C1 symm\0,1\B,0.1063968775,-0.1846631547,5.6826715874\B,-0.6112  
378732,0.8399755647,6.8027206068\B,-0.7930170835,-1.0061434477,6.83898  
97508\B,1.0531091114,-1.1922315806,6.6327055236\B,1.2362385977,0.65775  
06968,6.5974491035\B,1.6904607575,-0.2878991405,8.0619399674\B,0.51703  
12335,1.147968935,8.1807295357\B,-0.9110811804,-0.0275574723,8.3513071  
705\B,0.2605253095,-1.4686777396,8.2314445491\B,0.506615006,-0.1547097  
828,9.249204651\N,-0.0643649208,-0.194704274,4.1651287412\N,0.68019757  
81,-0.1878598128,10.8196884545\O,-0.4271696997,-0.2458874986,0.0473599  
565\C,-1.271439534,0.0351231646,3.605025529\C,-1.470196776,0.034597333  
7,2.2353320656\C,-0.3781266091,-0.2145688241,1.3895314623\C,0.87585274  
39,-0.452914991,1.9794950932\C,0.9952308998,-0.4355545622,3.3507013552  
\C,-0.5894431901,-0.6650223432,11.4870939784\C,-0.3681400216,-0.870004  
1809,13.0019242926\C,0.9814590292,-0.2576262687,13.4425541388\C,2.0955  
122252,-1.0491909198,12.7220006068\C,1.017157249,1.1898164707,12.90343  
08131\C,1.0122418116,1.1839605248,11.357065086\C,1.7954052151,-1.13408  
37669,11.2079942179\C,1.1011056926,-0.3226328747,14.9782463828\C,2.426



4635596, 0.1414002149, 15.5993910829\C, -1.6796791823, 0.0003558429, -0.617  
1442086\C, -1.4392423243, -0.1067035409, -2.1145921415\C, -2.7146772765, 0.  
1543426313, -2.9260860396\C, -2.4972231242, 0.0382268127, -4.4400526641\C,  
-3.7659723401, 0.3049636318, -5.2584989339\C, -3.5544837536, 0.1848231367,  
-6.7727793252\C, -4.8264363997, 0.4528624805, -7.5825568702\C, 2.416941133  
1, 0.0595219696, 17.131952663\C, 3.7300076105, 0.5177370919, 17.7782053888\  
C, 3.7129290727, 0.4301069844, 19.3071084852\H, 1.4665518086, -2.1268508514  
, 10.8974507921\H, 2.655099269, -0.8704619147, 10.5934347795\H, 2.170283512  
3, -2.0587654433, 13.1419004642\H, 3.0635558915, -0.5650150858, 12.88601314  
31\H, 0.2812334664, 1.8731643948, 10.9358010519\H, 1.9828090809, 1.44733716  
45, 10.9332420072\H, -2.4635933503, 0.2263493136, 1.8529521393\H, 0.1509354  
574, 1.7416635913, 13.2868937539\H, -2.0757916464, 0.2235053589, 4.30437629  
17\H, 1.9089801078, 1.7137628466, 13.2599822071\H, -0.3801658464, -1.937427  
3606, 13.2508538059\H, -1.1880186486, -0.4062995791, 13.5615475761\H, -0.88  
40613117, -1.5810559036, 10.9750730692\H, -1.3493565006, 0.0858256316, 11.2  
695027486\H, 0.1960105074, -2.5782488926, 8.6780082061\H, 0.6726363527, 2.2  
67015805, 8.5712201017\H, -1.971123615, 0.0862205546, 8.8932269269\H, 2.846  
060249, -0.3945819077, 8.35518507\H, 2.0391285816, 1.3593358101, 6.05600329  
66\H, 1.7050910349, -2.0589036067, 6.1273765612\H, -1.6956336566, -1.714698  
7643, 6.5018298509\H, -1.359877371, 1.6985950048, 6.435642968\H, 1.93462175  
92, -0.6140714284, 3.857272688\H, 1.7372848441, -0.6477828925, 1.3524825115  
\H, 0.9144680711, -1.3605680369, 15.288993382\H, 0.2813827363, 0.2700824366  
, 15.4090020553\H, 3.2545715605, -0.4686613601, 15.2161396908\H, 2.64470425  
97, 1.1752667897, 15.301325443\H, -2.0437680661, 1.0002063657, -0.34610348\  
H, -2.4204503341, -0.7381673532, -0.2833010176\H, -0.658456274, 0.609467312  
6, -2.3972108979\H, -1.0473354361, -1.1063118541, -2.3372451272\H, -3.49744  
17593, -0.5531038552, -2.6182296948\H, -3.0999224053, 1.1565422007, -2.6914  
945652\H, -1.710545122, 0.7411357881, -4.7478725279\H, -2.116356613, -0.965  
5164147, -4.6748048214\H, -4.1449481613, 1.3101212627, -5.0245717815\H, -4.  
5539707231, -0.3954032696, -4.9465787719\H, -2.7672755005, 0.8846183895, -7  
.0844201683\H, -3.1761817437, -0.8196538601, -7.006151246\H, -4.6429088483  
, 0.3608158782, -8.6577664505\H, -5.6204936441, -0.2549689074, -7.319138711  
3\H, -5.2096419975, 1.4624572441, -7.3959785681\H, 2.2030752024, -0.9741527  
322, 17.4392648184\H, 1.5890413224, 0.66789674, 17.5233760161\H, 4.55744359  
13, -0.0888735216, 17.3857102514\H, 3.9415738426, 1.5515329494, 17.47297033  
39\H, 4.6623133609, 0.7641183679, 19.7377338404\H, 2.9179108542, 1.05397460

67,19.7311428535\H,3.5390294266,-0.5983353233,19.6433540781\\Version=E  
M64L-G09RevA.02\State=1-A\HF=-1378.1629593\RMSD=9.062e-09\RMSF=2.219e-  
06\Dipole=-0.6102359,0.0643528,-0.9636907\Quadrupole=-24.9107445,-34.4  
887731,59.3995176,-1.4883266,19.1189824,-0.9756406\PG=C01 [X(C24H50B10  
N2O1)]\@

### 8a-trans

#P B3LYP/6-31G(d,p) FOpt fcheck Geom(nodistance, noangle) freq(no  
raman, readIso)\1-Dinitrogen-10-(4-C5-ThiaCyclohexane)decaborane\0,1  
\B,0.8799597442,1.0316969913,1.5971909906\B,0.9264248787,-0.849826563,  
1.6154148984\B,-0.9601655166,-0.8982379344,1.5322251607\B,-1.007956971  
,0.9833047706,1.512302488\B,1.3515083654,0.0870651157,0.1399903139\B,0  
.061307965,-1.2684863518,0.0893286473\B,-1.2964429517,0.0180290094,0.0  
239515847\B,-0.0047776085,1.3761926437,0.0623089084\B,-0.08701114,0.07  
63650361,2.5940417187\B,0.0729163862,0.0448878245,-0.9537649094\N,-0.1  
512818564,0.0894155474,4.0347584953\N,-0.2007785759,0.0998872776,5.151  
4225546\S,0.1748293992,0.0313310686,-2.8315052314\C,-1.0199342858,1.32  
64169436,-3.3708279909\C,-0.8072730658,-1.443078327,-3.3401478725\C,-1  
.3609503744,1.1654851887,-4.8525639601\C,-1.1666889414,-1.3745612579,-  
4.8255549779\C,-2.0499124518,-0.1687787525,-5.2054752716\C,-2.44361091  
59,-0.1828466275,-6.6952876383\C,-3.3275615483,-1.3588739279,-7.132838  
3703\C,-3.7898941848,-1.249060646,-8.5916496939\C,-4.6652069339,-2.423  
2916619,-9.0464098958\C,-5.1290270983,-2.3018923078,-10.5008770863\H,-  
2.9744981921,-0.232558568,-4.6106386481\H,1.6153679256,1.8348923859,2.  
0745291462\H,1.7005650285,-1.6055826927,2.1088815333\H,-1.7371288233,-  
1.6938440466,1.9540814333\H,-1.8245851337,1.7470610675,1.9177603347\H,  
2.4761836963,0.1108503408,-0.2502913347\H,0.1040708814,-2.385296585,-0  
.3266845542\H,-2.3883804309,-0.0151130568,-0.4597314708\H,-0.018872366  
,2.485195097,-0.3760171639\H,-1.8969895404,1.2362905139,-2.724529595\H  
, -0.5294282681,2.2779277872,-3.1558550943\H,-1.6896126094,-1.472639773  
6,-2.6952275819\H,-0.1788209552,-2.3036255084,-3.102581478\H,-2.021551  
4051,1.9974116073,-5.125741792\H,-0.4510037383,1.2814650946,-5.4562691  
719\H,-1.6863709712,-2.3073399339,-5.0693462894\H,-0.2491471038,-1.362  
2150396,-5.4291837325\H,-1.5309386879,-0.1628990917,-7.3086339112\H,-2  
.9745546659,0.7529788234,-6.9167525996\H,-2.7900781333,-2.3073893034,-  
7.0038281566\H,-4.2080571768,-1.4145378878,-6.476957726\H,-2.910664169

8,-1.1775693035,-9.247796615\H,-4.3449856511,-0.3098561076,-8.72673767  
87\H,-4.1081502385,-3.3611496729,-8.9168105281\H,-5.540764796,-2.49765  
1763,-8.3873347446\H,-5.7502171156,-3.1538968901,-10.7946784536\H,-5.7  
196570968,-1.3916140914,-10.6540840601\H,-4.2756415808,-2.2604584611,-  
11.1871839299\\Version=EM64L-G09RevA.02\State=1-A\HF=-1154.3248004\RMS  
D=8.417e-09\RMSF=6.224e-06\Dipole=-1.0360653,-0.1639728,-2.9542329\Qua  
drupole=-4.5013617,1.1339848,3.3673768,-0.8888771,-3.3495903,-1.069366  
\PG=C01 [X(C10H28B10N2S1)]\

## 8b

#P B3LYP/6-31G(d,p) FOpt fcheck Geom(nodistance, noangle) freq(nora  
man, readIso)\1-Dinitrogen-10-(4-C5-Quinuclidinedecaborane\0,1\B,2.5  
660359404,0.9408782572,-1.0485382313\B,2.5660069459,-0.9409777603,-1.0  
485286091\B,2.6079704623,-0.9425300883,0.8355337837\B,2.6079994521,0.9  
424570466,0.8355156644\B,1.0699866357,-0.0000277448,-1.3903391561\B,1.  
100197657,-1.317145288,-0.076423654\B,1.1287227782,-0.000009377,1.2435  
653118\B,1.1002326241,1.3171031139,-0.0764429477\B,3.6196822924,-0.000  
0644501,-0.1280191968\B,0.0476692104,-0.0000055464,-0.0466685849\N,5.0  
589437604,-0.0001231148,-0.161381906\N,6.1771217116,0.0003005582,-0.18  
70178817\N,-1.526421489,0.0000119211,0.030416871\C,-4.1636732251,0.000  
0382479,0.1883579017\C,-2.1344672873,0.0000052384,-1.3533620123\C,-3.6  
789012938,0.0000116545,-1.2797344894\C,-2.0164640335,-1.2281502502,0.7  
689012386\C,-2.016439645,1.2281970258,0.7688781677\C,-3.5599820391,-1.  
2461704183,0.8706285263\C,-3.5599582967,1.246256024,0.8705917904\C,-5.  
7061857688,0.0000509639,0.2183139472\C,-6.3815602588,0.0000366929,1.59  
76611391\C,-7.9136575795,0.0000585505,1.5021637345\C,-8.6092974678,0.0  
000382778,2.8690271424\C,-10.1374706214,0.0000617482,2.7686373303\H,2.  
995038146,1.7205066739,-1.8378937582\H,2.9949832333,-1.7206303112,-1.8  
378743174\H,3.0700746612,-1.7232236239,1.6048806161\H,3.0701295118,1.7  
231483863,1.6048492653\H,0.622678158,-0.0000293098,-2.4958065353\H,0.6  
801878456,-2.434145325,-0.0678679212\H,0.7220838267,0.0000048062,2.367  
1199373\H,0.6802533791,2.4341146781,-0.0679038845\H,-1.7381697236,-0.8  
774774037,-1.8651332576\H,-1.7381637488,0.8774786976,-1.8651444879\H,-  
4.0784837704,-0.8792312503,-1.7967419298\H,-4.0784771865,0.8792398765,  
-1.7967717578\H,-1.6217417237,-2.0878254022,0.2283423969\H,-1.53156527  
84,-1.2075534583,1.7455425835\H,-1.6216912933,2.0878547592,0.228311041

3\H,-1.5315489933,1.2076009077,1.7455235762\H,-3.9566495028,-2.1515132  
457,0.397812108\H,-3.8576070167,-1.2815170973,1.9225641749\H,-3.956601  
7502,2.1515915386,0.3977412364\H,-3.8575893763,1.2816459804,1.92252401  
51\H,-6.0559940777,-0.8766213745,-0.3448408068\H,-6.0559812731,0.87674  
1708,-0.3448201264\H,-6.0631248751,-0.8779197167,2.1744043436\H,-6.063  
1020125,0.8779637052,2.1744360838\H,-8.2426406461,-0.877625909,0.92785  
16008\H,-8.242617823,0.8777758091,0.9278886661\H,-8.2796051276,-0.8772  
450929,3.4418732483\H,-8.2795809605,0.8772874105,3.4419118631\H,-10.60  
30053838,0.0000460293,3.7592529323\H,-10.4997435266,0.8837992856,2.231  
4398979\H,-10.4997681569,-0.8836416187,2.2314003165\\Version=EM64L-G09  
RevA.02\State=1-A\HF=-888.9155097\RMSD=8.361e-09\RMSF=3.332e-05\Dipole  
=-3.3943496,-0.000001,0.2187898\Quadrupole=-1.5230411,0.9501275,0.5729  
135,-0.0009225,1.6974167,0.00003\PG=C01 [X(C12H31B10N3)]\\

### 8c

1\1\GINC-OCTOPUS\FOpt\RB3LYP\6-31G(d,p)\C5H18B10N2S1\PIOTR\01-Sep-2011  
\0\#\#P B3LYP/6-31G(d,p) FOpt freq(noraman, ReadIso) fcheck #P Geom(NoD  
istance, NoAngle)\1-Dinitrogen-10-ThiaCyclohexanedecaborane, Cs symme  
try eclipsed\\0,1\B,-0.9304852946,2.6066145201,0.9403709431\B,-0.93048  
52946,2.6066145243,-0.9403709315\B,0.9234284338,2.2337062519,-0.941975  
5991\B,0.9234284338,2.2337062477,0.941975609\B,-1.596945015,1.22550383  
36,0.0000000027\B,-0.3000061014,0.9600201775,-1.3219845485\B,1.0018454  
626,0.7047482346,0.0000000016\B,-0.3000061014,0.9600201716,1.321984552  
8\B,0.2008686194,3.4295506705,0.0000000076\N,0.4850825994,4.8438549841  
,0.0000000108\N,0.7051772978,5.9396972061,0.0000000132\B,-0.500641679,  
-0.0520919675,-0.0000000001\S,-0.8870100988,-1.8923529782,-0.000000004  
2\C,0.1108935559,-2.5722909718,1.3958498523\C,0.1108935559,-2.57229096  
55,-1.3958498638\C,0.2344865892,-4.0929275035,1.282934624\C,0.23448658  
92,-4.0929274978,-1.2829346422\C,0.9471259026,-4.5498870561,-0.0000000  
101\H,1.0238911184,-5.642241207,-0.0000000126\H,1.9753348535,-4.164102  
3547,-0.0000000093\H,-1.6022719424,3.2020950098,1.7200011878\H,-1.6022  
719424,3.2020950174,-1.7200011735\H,1.774109313,2.5195666748,-1.722380  
6405\H,1.774109313,2.5195666671,1.7223806518\H,-2.7681735163,1.0112322  
649,0.0000000023\H,-0.380606641,0.540049137,-2.4352217635\H,2.00730849  
09,0.059272808,0.0000000001\H,-0.380606641,0.5400491261,2.4352217659\H  
,1.0808178397,-2.0688004213,1.36433906\H,-0.4122976202,-2.2584479168,2

.3011790181\H,1.0808178397,-2.0688004152,-1.3643390692\H,-0.4122976202  
, -2.2584479066, -2.3011790282\H, 0.7898151734, -4.4440226867, 2.1604426085  
\H, -0.7617892808, -4.5490211353, 1.3412506395\H, 0.7898151734, -4.44402267  
71, -2.1604426283\H, -0.7617892808, -4.5490211293, -1.3412506598\\Version=  
EM64L-G09RevA.02\State=1-A'\HF=-957.7424404\RMSD=5.822e-09\RMSF=4.874e  
-05\Dipole=0.4870566,-2.8903756,0.\Quadrupole=-9.4512483,14.8221725,-5  
.3709242,0.5833171,0.,0.\PG=CS [SG(C1H4B4N2S1),X(C4H14B6)]\@

### 8d

1\1\GINC-OCTOPUS\FOpt\RB3LYP\6-31G(d,p)\C7H21B10N3\PIOTR\02-Sep-2011\0  
\#P B3LYP/6-31G(d,p) FOpt(CalcFC) freq(noraman, ReadIso) fcheck #P Ge  
om(NoDistance, NoAngle)\1-Dinitrogen-10-Quinuclidinedecaborane, C1 sy  
mmetry free\0,1\B,3.5496881326,-0.0091223048,0.0088926491\B,-0.022351  
6245,0.0398693275,-0.0137188204\B,1.0094937967,-1.2620854453,0.2570639  
904\B,1.0486035498,1.3185334825,-0.2738858656\B,1.025833646,0.29677119  
96,1.2815562537\B,1.0345216315,-0.2352404093,-1.2990882345\B,2.5279438  
153,1.1191598877,0.7335160866\B,2.5061536514,-1.107040373,-0.729388517  
6\B,2.5342896607,0.7376900401,-1.1107993238\B,2.4998004073,-0.72581977  
86,1.115030953\N,-1.5980610121,0.0186145432,-0.0087795907\C,-2.1190870  
522,-0.8261592817,-1.1556478171\C,-2.154716211,1.4206076502,-0.1508331  
188\C,-2.1110644456,-0.5755007983,1.2909165989\C,-3.6583886399,-0.9665  
083124,-1.0850956826\C,-3.6977727737,1.3947893379,-0.2668928398\C,-3.6  
540415661,-0.4933328631,1.3666439933\C,-4.2037178716,-0.0316019384,0.0  
073346275\N,4.9892761641,-0.0276394949,0.0176619896\N,6.1076304676,-0.  
0425596098,0.0246743911\H,-1.8066436733,1.9742165529,0.7226150154\H,-1  
.674327374,1.861022392,-1.0240576901\H,-4.1358162332,2.0986999217,0.44  
77295905\H,-4.0099030414,1.7180708955,-1.2655087739\H,-1.743010511,-1.  
6019483971,1.3165071259\H,-1.6192744194,-0.0314233467,2.0962380703\H,-  
4.0654437669,-1.4724319158,1.6315570948\H,-3.961359969,0.2056395054,2.  
1515732724\H,-5.2975979628,-0.0514903083,0.0128224207\H,-4.0984888268,  
-0.7172697342,-2.0557828491\H,-3.9375818393,-2.0020819018,-0.864105250  
3\H,-1.7833364484,-0.3375347212,-2.0703795114\H,-1.6042298064,-1.78495  
85072,-1.0913418185\H,2.9956156134,1.3373865391,-2.0286382593\H,2.9298  
416048,-1.3377441392,2.0399149094\H,2.9835122815,2.0338500746,1.342321  
3574\H,2.9418425001,-2.0344625805,-1.3334479353\H,0.6168009531,-0.4554  
282613,-2.3945871371\H,0.6448829308,2.417594383,-0.5001898425\H,0.6000

```
350659,0.5286148253,2.3725951598\H,0.5606764741,-2.3472280789,0.477446  
4804\\Version=EM64L-G09RevA.02\State=1-A\HF=-692.3333972\RMSD=4.612e-0  
9\RMSF=1.441e-06\Dipole=-3.1984561,-0.0207201,0.0002209\Quadrupole=11.  
8128113,-5.899894,-5.9129173,-0.2384504,0.1376805,0.0026089\PG=C01 [X(  
C7H21B10N3)]\
```

### 8e

```
1\1\GINC-OCTOPUS\FOpt\RB3LYP\6-31G(d,p)\C5H13B10N3\PIOTR\02-Sep-2011\  
\#\#P B3LYP/6-31G(d,p) FOpt freq(noraman, ReadIso) fcheck #P Geom(NoDis  
tance, NoAngle)\1-Dinitrogen-10-Pyridinedecaborane, C2v symmetry stag  
gered\0,1\B,0.,0.,-0.5131220143\B,0.,0.,3.0454239495\B,0.,-1.33413501  
85,2.0151945397\B,1.3337620591,0.,2.0120017497\B,0.,1.3341350185,2.015  
1945397\B,-1.3337620591,0.,2.0120017497\B,-0.9312667882,-0.9371344829,  
0.5279792826\B,0.9312667882,-0.9371344829,0.5279792826\B,0.9312667882,  
0.9371344829,0.5279792826\B,-0.9312667882,0.9371344829,0.5279792826\C,  
0.,-1.2010824643,-4.1048618277\C,0.,1.2010824643,-4.1048618277\C,0.,-1  
.1703305754,-2.7196702434\C,0.,1.1703305754,-2.7196702434\C,0.,0.,-4.8  
143875602\N,0.,0.,-2.0389801006\N,0.,0.,4.4860393181\N,0.,0.,5.6043291  
087\H,0.,-2.4347278417,2.4659932021\H,2.4356805356,0.,2.4589751214\H,0  
.,2.4347278417,2.4659932021\H,-2.4356805356,0.,2.4589751214\H,0.,-2.15  
84370951,-4.6127421928\H,0.,2.1584370951,-4.6127421928\H,-1.7145603187  
,-1.7169556252,0.0782338304\H,1.7145603187,-1.7169556252,0.0782338304\  
H,1.7145603187,1.7169556252,0.0782338304\H,-1.7145603187,1.7169556252,  
0.0782338304\H,0.,-2.063324402,-2.1083852799\H,0.,2.063324402,-2.10838  
52799\H,0.,0.,-5.8993762754\\Version=EM64L-G09RevA.02\State=1-A1\HF=-6  
11.2966012\RMSD=3.195e-09\RMSF=5.807e-05\Dipole=0.,0.,-3.3746001\Quadr  
upole=-15.0392928,-6.8617711,21.9010639,0.,0.,0.\PG=C02V [C2(H1C1N1B1B  
1N1N1),SGV(C4H6B2),SGV'(H2B2),X(H4B4)]\
```

### 8f

```
1\1\GINC-OCTOPUS\FOpt\RB3LYP\6-31G(d,p)\C6H15B10N3O1\PIOTR\20-Sep-2012  
\0#\#P B3LYP/6-31G(d,p) FOpt freq(noraman, ReadIso) fcheck #P Geom(NoD  
istance, NoAngle)\1-Dinitrogen-10-(4MeO-Pyridine)decaborane, Cs symme  
try staggered\0,1\B,-0.0213292769,0.,0.0414086863\B,0.0081158294,0.,3  
.6019915771\B,1.3330858406,0.,2.5590314452\B,-0.0001633608,1.332915335  
4,2.5684336211\B,-1.3341154374,0.,2.5808073846\B,-0.0001633608,-1.3329
```

153354,2.5684336211\B,0.923132213,-0.9317296087,1.0754480729\B,0.92313  
2213,0.9317296087,1.0754480729\B,-0.948172498,0.9325663668,1.090337627  
3\B,-0.948172498,-0.9325663668,1.0903376273\C,1.1860857696,0.,-3.55452  
11382\C,-1.2268766167,0.,-3.5522566046\C,1.1397903242,0.,-2.1723369049  
\C,-1.1926625955,0.,-2.1770272514\C,-0.0194615193,0.,-4.274148368\N,-0  
.0234432758,0.,-1.485519685\N,0.0183311152,0.,5.0413390851\N,0.0257309  
552,0.,6.1600205364\C,1.0724000687,0.,-6.3990542346\O,-0.1222295146,0.  
, -5.6109176856\H,2.4377285963,0.,3.0006807652\H,0.0035300566,2.4349710  
442,3.0158737586\H,-2.4314556793,0.,3.0400494706\H,0.0035300566,-2.434  
9710442,3.0158737586\H,2.1505431696,0.,-4.0441645806\H,-2.1713918413,0  
, -4.0821934272\H,1.7011554812,-1.7147086586,0.621045759\H,1.701155481  
2,1.7147086586,0.621045759\H,-1.7330804398,1.7164268943,0.6501365744\H  
, -1.7330804398,-1.7164268943,0.6501365744\H,2.0372524616,0.,-1.5671713  
536\H,-2.0902727754,0.,-1.5726213194\H,1.6708911387,-0.8966510461,-6.2  
06350901\H,0.7386152306,0.,-7.4359204483\H,1.6708911387,0.8966510461,-  
6.206350901\\Version=EM64L-G09RevA.02\State=1-A'\HF=-725.8280959\RMSD=  
8.156e-09\RMSF=1.476e-05\Dipole=0.5653295,0.,-4.1956535\Quadrupole=-6.  
2519497,-14.7797172,21.0316669,0.,-6.3397274,0.\PG=CS [SG(C6H7B4N3O1),  
X(H8B6)]\\

### 16-trans

1\1\GINC-OCTOPUS\FOpt\RB3LYP\6-31G(d,p)\C11H25B10N1O1S1\PIOTR\20-Sep-2  
012\0\#P B3LYP/6-31G(d,p) FOpt freq(noraman, ReadIso) fcheck #P Geom(  
NoDistance, NoAngle)\1-Pyridine-10-ThiaCyclohexanedecaborane, Cs symm  
etry eclipsed\0,1\B,0.,-0.0126254158,0.0056341592\B,0.,0.0087541598,3  
.5763858147\B,1.3198297985,-0.0024874411,1.0378262976\B,-1.3198297985,  
-0.0024874411,1.0378262976\B,0.9284009926,-0.9333445332,2.5424518347\B  
, -0.9262349586,0.9405696082,2.5297528821\B,-0.9284009926,-0.9333445332  
,2.5424518347\B,0.9262349586,0.9405696082,2.5297528821\B,0.,1.31896375  
94,1.032437778\B,0.,-1.3275772982,1.0510963912\S,0.,-0.0131583357,-1.8  
68514238\C,-1.3904506621,-1.1300270633,-2.3368471238\C,1.3904506621,-1  
.1300270633,-2.3368471238\C,0.,-2.3417137307,-4.1126035113\C,-1.282985  
3588,-1.5534717962,-3.8031430358\C,1.2829853588,-1.5534717962,-3.80314  
30358\C,0.,1.1931039435,5.7798914545\C,0.,1.2530392759,7.1626840888\C,  
0.,0.0555611052,7.8938648697\C,0.,-1.1578861634,7.1841773663\C,0.,-1.1  
366849127,5.8078510445\C,0.,1.1678497049,10.0067214219\N,0.,0.02431191

58,5.1039741713\O,0.,-0.0346077466,9.2351433453\H,0.,-2.0386255942,5.2  
100697549\H,0.,-2.0974753014,7.7229229193\H,0.,2.22269919,7.642073784\  
H,0.,2.0830835685,5.1638161041\H,0.,2.4262633254,0.5878870066\H,0.,0.8  
487716982,11.0484421253\H,0.,-2.4469438032,0.6249716741\H,0.,-3.273426  
0439,-3.5310950684\H,0.,-2.6327459225,-5.1685932035\H,1.7126569462,1.7  
247928147,2.973021822\H,-1.7168274506,-1.713751961,2.9888392983\H,1.35  
35339091,-1.979915503,-1.6497333438\H,-1.3535339091,-1.979915503,-1.64  
97333438\H,1.3408932395,-0.6668975296,-4.4474019383\H,-1.3408932395,-0  
.6668975296,-4.4474019383\H,2.1602335811,-2.1677442108,-4.0382165742\H  
, -2.1602335811,-2.1677442108,-4.0382165742\H,-2.297894583,-0.560046465  
3,-2.1284104504\H,2.297894583,-0.5600464653,-2.1284104504\H,-2.4377080  
362,-0.008462565,0.6157375804\H,2.4377080362,-0.008462565,0.6157375804  
\H,-1.7126569462,1.7247928147,2.973021822\H,1.7168274506,-1.713751961,  
2.9888392983\H,-0.896013674,1.7658099618,9.8074996273\H,0.896013674,1.  
7658099618,9.8074996273\\Version=EM64L-G09RevA.02\State=1-A'\HF=-1211.  
0872263\RMSD=8.160e-09\RMSF=3.301e-05\Dipole=0.,-0.3757164,1.3525992\Q  
uadrupole=-29.6943216,-22.903056,52.5973776,0.,0.,19.6045092\PG=CS [SG  
(C7H9B4N1O1S1),X(C4H16B6)]\@

## 17

1\1\GINC-OCTOPUS\FOpt\RB3LYP\6-31G(d,p)\C19H31B10N1O1S1\PIOTR\07-Oct-2  
012\0\#P B3LYP/6-31G(d,p) FOpt fcheck Geom(nodistance, noangle) freq(  
noraman, readIso)\4-MeO-Stilbazole-B10-thian\0,1\B,0.0282853297,-0.0  
149079667,-0.2087567294\B,-0.3077253375,-0.1172678215,3.3474012309\B,1  
.2415012508,0.051554284,0.9461160205\B,-1.3798381013,-0.1334135545,0.6  
930580515\B,0.7786469424,-0.9572913669,2.3780197006\B,-1.1961309083,0.  
7848860229,2.2406126722\B,-1.0621442856,-1.0871979379,2.2003300273\B,0  
.6407276998,0.9145743447,2.4178758219\B,-0.1650601973,1.2770906672,0.8  
491713537\B,0.0266229721,-1.362359171,0.7941021458\S,0.2034673752,0.04  
88859636,-2.0736199011\C,-1.0515244817,-1.146612192,-2.702877463\C,1.7  
095795744,-0.9510827267,-2.4367341276\C,0.5838015139,-2.1971760676,-4.  
3691767412\C,-0.7766871694,-1.5118169682,-4.1629624481\C,1.7710280747,  
-1.3314353743,-3.9173687921\C,-0.6027333827,0.9879246466,5.5736348816\  
C,-0.7351055979,0.9885561244,6.9452217625\C,-0.717167988,-0.2231561263  
,7.6698479317\C,-0.5583641858,-1.3959869935,6.9034657265\C,-0.43027965  
43,-1.3353509109,5.5306703452\C,-1.0050626442,0.7131677615,9.972706312



8\C,-1.1401527734,0.651954322,11.4215335166\C,-1.2933504298,1.84900031  
65,12.1412734717\C,-1.4279899706,1.8683929373,13.5274906134\C,-1.41143  
04091,0.660810413,14.2362546037\C,-1.6899732707,1.7360542532,16.352109  
3061\C,-1.259189889,-0.5510883477,13.536973062\C,-1.1268412749,-0.5526  
025884,12.1615111689\C,-0.849309727,-0.3220088222,9.1151901903\O,-1.53  
31009374,0.5493654371,15.5840726659\N,-0.4510416797,-0.1578460501,4.86  
22229559\H,-0.8149094416,-1.3362500208,9.5057699609\H,-0.8254299405,2.  
4021370403,16.243377018\H,-2.6018343541,2.2777609809,16.0728441795\H,-  
1.7669711487,1.4121089615,17.3903570744\H,-1.0111487303,-1.503140877,1  
1.6509577708\H,-1.2489866721,-1.4752471368,14.1049153917\H,-1.54362951  
88,2.816182962,14.0386903368\H,-1.3075431082,2.7920111731,11.601026404  
8\H,-1.036994312,1.7221527779,9.5649665217\H,-0.3069107953,-2.21550176  
25,4.91321121\H,-0.5347790089,-2.3665519576,7.3875004015\H,-0.85263195  
06,1.9423292856,7.4453171592\H,-0.6118611878,1.8960555367,4.9850854494  
\H,-0.2042019089,2.3960766463,0.4368254099\H,0.1484542311,-2.463098122  
4,0.3376415175\H,0.5975922909,-3.1456160296,-3.8156482272\H,0.70389203  
68,-2.4517779561,-5.4278854795\H,1.324042405,1.7349556162,2.955331732\  
H,-1.8307459397,-1.9340968126,2.5486173402\H,1.6709367162,-1.824079601  
3,-1.7793675621\H,-1.0169891059,-2.014455637,-2.0384922963\H,1.8237876  
307,-0.4219125946,-4.5292350201\H,-0.8386248435,-0.6103980217,-4.78586  
21921\H,2.709140316,-1.874191231,-4.0837548009\H,-1.580934723,-2.17791  
7593,-4.497352205\H,-2.0137728683,-0.64918538,-2.5669222666\H,2.549387  
445,-0.3260222177,-2.1271059839\H,-2.4502151748,-0.2035112591,0.166613  
6914\H,2.3916170011,0.1382395702,0.6338734714\H,-2.0767166894,1.494853  
735,2.6270829349\H,1.5772159122,-1.6936965826,2.8773337208\\Version=EM  
64L-G09RevC.01\State=1-A\HF=-1519.5579347\RMSD=3.591e-09\RMSF=7.114e-0  
6\Dipole=-0.2093292,-0.2653421,2.3716892\Quadrupole=-38.829217,-25.564  
7913,64.3940084,-3.6942662,-12.0216281,27.4851398\PG=C01 [X(C19H31B10N  
101S1)]\

## 18

1\1\GINC-OCTOPUS\FOpt\RB3LYP\6-31G(d,p)\C12H22B1N1O1\PIOTR\18-Oct-2012  
\0\#\#P B3LYP/6-31G(d,p) FOpt fcheck Geom(nodistance, noangle) freq(nor  
aman, readIso)\4-C7H15O-Pyridine-BH3, Cs\0,1\B,0.0150702934,0.,-0.00  
1346906\N,0.0068506595,0.,1.6185649387\O,0.1723076399,0.,5.7560836301\  
C,-1.1334568076,0.,2.3258809294\C,-1.1662213599,0.,3.7152307489\C,0.04

60170109,0.,4.4166876884\C,1.240511432,0.,3.673387966\C,1.1771487704,0  
. ,2.297189576\C,-1.0109184919,0.,6.5732964743\C,-0.5663825162,0.,8.027  
4118706\C,-1.7516561629,0.,9.0014947354\C,-1.315389144,0.,10.472019436  
4\C,-2.4897630617,0.,11.4579467845\C,-2.0522793717,0.,12.9279398171\C,  
-3.2285668881,0.,13.9086575935\H,-1.146698033,0.,-0.3431755054\H,0.609  
6903143,-1.0059818481,-0.32769095\H,0.6096903143,1.0059818481,-0.32769  
095\H,-2.0408885324,0.,1.7346753305\H,-2.1241362904,0.,4.2177940532\H,  
2.1939054085,0.,4.187892329\H,2.0671707737,0.,1.6795387515\H,-1.612550  
1046,-0.8897871755,6.3446763747\H,-1.6125501046,0.8897871755,6.3446763  
747\H,0.0645812208,-0.8799278861,8.200828236\H,0.0645812208,0.87992788  
61,8.200828236\H,-2.3841092612,0.8784920383,8.8114447358\H,-2.38410926  
12,-0.8784920383,8.8114447358\H,-0.6817134964,-0.8777987449,10.6606668  
505\H,-0.6817134964,0.8777987449,10.6606668505\H,-3.1240245622,-0.8778  
758213,11.2689795787\H,-3.1240245622,0.8778758213,11.2689795787\H,-1.4  
18499433,-0.8772283235,13.1157702513\H,-1.418499433,0.8772283235,13.11  
57702513\H,-2.8831821135,0.,14.9473905669\H,-3.8614492857,0.8837209794  
,13.7691620179\H,-3.8614492857,-0.8837209794,13.7691620179\\Version=EM  
64L-G09RevC.01\State=1-A'\HF=-625.3958222\RMSD=7.054e-09\RMSF=8.669e-0  
6\Dipole=-0.5094714,0.,3.4519901\Quadrupole=20.049443,14.8143936,-34.8  
638367,0.,4.814401,0.\PG=CS [SG(C12H6B1N1O1),X(H16)]\

## 19

1\1\GINC-OCTOPUS\FOpt\RB3LYP\6-31G(d,p)\C14H16B1N1O1\PIOTR\17-Oct-2012  
\0\\#P B3LYP/6-31G(d,p) FOpt fcheck Geom(nodistance, noangle) freq(nor  
aman, readIso)\4-MeO-Stilbazole-BH3\\0,1\B,6.0803195135,-0.1845620504  
, -0.0793196037\N,4.4817844207,0.0367814451,-0.0903634374\C,3.648207667  
8,-1.0265489848,-0.0798963582\C,2.2741634099,-0.8996930302,-0.04945947  
3\C,1.6774881745,0.3792876018,-0.0318594353\C,0.239785034,0.6190746193  
, -0.0016855458\C,-0.7242766202,-0.3281402412,0.0258607725\C,2.56548402  
92,1.4703925589,-0.0480916554\C,3.9356446713,1.2665725722,-0.078217470  
3\C,-2.1676565809,-0.1256761881,0.0582318933\C,-3.0113919461,-1.248208  
4837,0.0923009836\C,-4.3994137785,-1.1319848328,0.12548723\C,-4.982460  
4946,0.1408820278,0.1248050186\C,-7.2094083264,-0.7236386164,0.1918121  
717\C,-4.1574356227,1.2803245818,0.0902966283\C,-2.7821388614,1.147090  
9671,0.057784734\O,-6.3186364053,0.3841390435,0.1553482664\H,6.3544101  
495,-0.5288798274,1.0532559994\H,6.30136566,-1.065086847,-0.8833474214

\H,6.5739242835,0.8800943786,-0.3768831372\H,4.1382661171,-1.992593216  
7,-0.0990241345\H,1.6735465079,-1.8016522172,-0.0443298508\H,-0.044607  
6765,1.6687377262,0.000232937\H,-0.4219048864,-1.3740928203,0.02615734  
27\H,2.1847943867,2.4865439509,-0.0403624109\H,4.6442228523,2.08540599  
34,-0.0947561523\H,-2.5695220584,-2.2412962889,0.0933031968\H,-5.00866  
26386,-2.0270592687,0.1513657168\H,-7.101307597,-1.3561483036,-0.69776  
54621\H,-7.0557650049,-1.3337716273,1.0902696829\H,-8.2136345405,-0.29  
93436731,0.2120583848\H,-4.6287968316,2.2573587022,0.0898411878\H,-2.1  
728530078,2.0447313491,0.0311074016\\Version=EM64L-G09RevC.01\State=1-  
A\HF=-697.9607594\RMSD=8.076e-09\RMSF=2.437e-06\Dipole=-4.1611961,-0.2  
011532,0.0629551\Quadrupole=-27.6841659,20.7974208,6.8867451,9.6613585  
,0.2367651,-0.2693408\PG=C01 [X(C14H16B1N1O1)]\

## 20c

1\1\GINC-OCTOPUS\FOpt\RB3LYP\6-31G(d,p)\C5H18B10S1\PIOTR\06-Oct-2012\0  
\#P B3LYP/6-31G(d,p) FOpt freq(noraman, ReadIso) fcheck #P Geom(NoDis  
tance, NoAngle)\1-ylide-10-ThiaCyclohexanedecaborane, Cs symmetry ecl  
ipsed\0,1\B,-0.9573886604,2.6103641785,0.9661262127\B,-0.9573886604,2  
.6103641785,-0.9661262127\B,0.9532142355,2.2379218099,-0.9656189065\B,  
0.9532142355,2.2379218099,0.9656189065\B,-1.6007500719,1.2185028774,0.  
\B,-0.292298777,0.9586872592,-1.3313716214\B,1.0216126955,0.7092662009  
,0.\B,-0.292298777,0.9586872592,1.3313716214\B,0.1645003185,3.27990177  
5,0.\B,-0.4827712941,-0.0359488469,0.\S,-0.8641579287,-1.8705158407,0.  
\C,0.1277751407,-2.56308214,1.3929710739\C,0.1277751407,-2.56308214,-1  
.3929710739\C,0.2247099756,-4.0862776315,1.2828793247\C,0.2247099756,-  
4.0862776315,-1.2828793247\C,0.9281010905,-4.5577310441,0.\H,0.9837554  
674,-5.6513542086,0.\H,1.9635400113,-4.1920509705,0.\H,-1.6313936387,3  
.2002337463,1.7470791029\H,-1.6313936387,3.2002337463,-1.7470791029\H,  
1.8008315368,2.5275768937,-1.7467342052\H,1.8008315368,2.5275768937,1.  
7467342052\H,-2.7675406205,0.9836244111,0.\H,-0.3722283674,0.528698750  
8,-2.4401885535\H,2.0221369545,0.0570706303,0.\H,-0.3722283674,0.52869  
87508,2.4401885535\H,1.1060561492,-2.0762685348,1.3559732458\H,-0.3858  
697736,-2.2382962636,2.2998555107\H,1.1060561492,-2.0762685348,-1.3559  
732458\H,-0.3858697736,-2.2382962636,-2.2998555107\H,0.7738385179,-4.4  
460457394,2.1607005608\H,-0.7797926527,-4.5236703251,1.3421977894\H,0.  
7738385179,-4.4460457394,-2.1607005608\H,-0.7797926527,-4.5236703251,-

```
1.3421977894\\Version=EM64L-G09RevC.01\\State=1-A'\HF=-848.1537886\RMSD  
=5.259e-09\RMSF=4.061e-05\Dipole=0.4433682,-3.0593084,0.\Quadrupole=-5  
.8874757,7.7864228,-1.8989471,0.2967842,0.,0.\PG=CS [SG(C1H4B4S1),X(C4  
H14B6)]\\@
```

## 21-trans

```
1\1\GINC-OCTOPUS\FOpt\RB3LYP\6-31G(d,p)\C23H43B9O2S1\PIOTR\01-May-2010  
\0\\#P B3LYP/6-31G(d,p) FOpt Geom(NoAngle, noDistance) fcheck freq(nor  
aman)\C5-C5S-CB9-COO-PhC5 start at the HF/6-31G* geom\\0,1\B,-0.11096  
61673,0.0065589271,0.6406172951\B,-0.4054918217,-0.1196476622,2.484218  
8462\B,1.4161431303,-0.1750336982,2.7715773652\B,1.7110293492,-0.04917  
11152,0.9285783835\C,0.6697797444,0.8397529434,1.7714268997\C,0.712124  
5528,2.331218494,1.8252193342\O,0.5569656609,2.7628129814,3.110901641\  
C,0.574024728,4.1245940388,3.4232751495\C,1.5299121911,5.0087850931,2.  
9250994644\C,1.5113749115,6.3325272544,3.3623982533\C,0.5656847172,6.7  
910697835,4.2892791534\C,0.592066389,8.2204862334,4.7853016\C,1.514742  
2655,8.4229362014,6.0038504231\C,1.5514876077,9.8725315818,6.500557218  
5\C,2.4730989562,10.0816586166,7.7087479306\C,2.5093149557,11.53264624  
14,8.1975858721\H,1.5126524734,11.874465839,8.4992368975\H,3.175015401  
3,11.6491699187,9.0589937113\H,2.863836019,12.2072125651,7.40988418\H,  
2.148598764,9.4265596666,8.5285491409\H,3.4895048007,9.7575355461,7.44  
73542685\H,1.8749561631,10.5299880583,5.6806114451\H,0.5331376553,10.1  
94935264,6.7615069866\H,1.1851089989,7.7611881759,6.816012152\H,2.5299  
366605,8.0964974089,5.7414545038\H,0.9208559629,8.8843634177,3.9756219  
482\H,-0.424567713,8.5367821323,5.0508828513\C,-0.3779715473,5.8749977  
599,4.7716994058\C,-0.3797637781,4.5483027236,4.3451627915\H,-1.108614  
3564,3.8354290156,4.7159668282\H,-1.1260936746,6.2033092531,5.48895621  
48\H,2.2511770086,7.0252805656,2.9688420988\H,2.2607753556,4.674463111  
6,2.2007436963\O,0.863365165,3.051591638,0.8690542783\H,-0.7345846641,  
0.5880908319,-0.1801456061\H,-1.2671689399,0.3596656048,3.1397900388\H  
,2.0617583134,0.2576612568,3.6644734095\H,2.5900649708,0.4882245732,0.  
3456546139\B,0.833020172,-1.4856381646,0.2995433887\B,-0.6776742096,-1  
.536732486,1.3968785609\B,0.4159102083,-1.6664906025,2.905143238\B,1.9  
249093765,-1.61589133,1.8074486287\B,0.6037271404,-2.6096932336,1.5265  
653511\S,0.5604682284,-4.4889116731,1.4020537355\C,2.1215807915,-4.928  
8287055,0.5266721128\C,2.048935066,-6.3540615003,-0.0226035658\C,0.938
```

5084225,-6.5780822274,-1.0696257943\C,-0.4542717689,-6.2649335348,-0.4  
861234214\C,-0.6116086123,-4.8301858606,0.0204124512\C,1.0235336038,-8  
.0101807206,-1.6323147786\C,0.1197054853,-8.2993408806,-2.8388852963\C  
,0.336014556,-9.7007470772,-3.4245748918\C,-0.5662152383,-10.0081234,-  
4.6261011779\C,-0.3396019965,-11.406668279,-5.2074250485\H,1.001667591  
3,-1.8360688032,-0.8287508031\H,-1.78830213,-1.914269606,1.1888777514\  
H,0.2327254902,-2.1705108099,3.9669877927\H,3.0205084392,-2.0619186918  
,1.9485666106\H,2.2662682296,-4.1816690142,-0.2581214219\H,2.912752487  
8,-4.8076860584,1.2693272907\H,1.9237045001,-7.0636846793,0.8059928837  
\H,3.0231168504,-6.5758108042,-0.4749557628\H,1.1179428021,-5.87703783  
21,-1.8997161918\H,-1.2214645499,-6.414864732,-1.2531268708\H,-0.68111  
39679,-6.9715293465,0.3235337382\H,-0.4111368343,-4.0869933921,-0.7557  
0492\H,-1.604642992,-4.6400691407,0.4326425702\H,2.065178366,-8.201131  
3036,-1.9238595802\H,0.8005202291,-8.72602381,-0.8277714173\H,-0.93618  
18279,-8.1939159343,-2.5573644451\H,0.3047518535,-7.5476114718,-3.6193  
33922\H,1.3879674525,-9.8106179392,-3.7241141858\H,0.1645812442,-10.45  
27786579,-2.6411891285\H,-1.6174425594,-9.9022342962,-4.3255886982\H,-  
0.3970897184,-9.2545243664,-5.4070860896\H,-0.9963125574,-11.595087243  
8,-6.0625534572\H,0.6942644808,-11.5314649201,-5.5486515106\H,-0.53608  
13147,-12.1835047118,-4.4598654097\\Version=EM64L-G09RevA.02\State=1-A  
\HF=-1674.8865527\RMSD=5.656e-09\RMSF=3.075e-06\Dipole=0.0800887,-3.79  
04274,-0.8804738\Quadrupole=-15.8960307,30.5974084,-14.7013776,1.05823  
45,-1.2109348,24.9424581\PG=C01 [X(C23H43B9O2S1)]\

## 21-cis

1\1\GINC-OCTOPUS\FOpt\RB3LYP\6-31G(d,p)\C23H43B9O2S1\PIOTR\02-May-2010  
\0\#\#P B3LYP/6-31G(d,p) FOpt Geom(NoAngle, noDistance) fcheck freq(nor  
aman)\C5-C5S-CB9-COO-PhC5, cis, CB9 axial, at HF/6-31G\* geom\0,1\B,-  
0.4724630517,0.4732894816,0.9271714499\B,-0.6533286663,-0.1836305709,2  
.6392003576\B,-1.283931448,-1.8050148968,1.9514622759\B,-1.1049296039,  
-1.1455649217,0.2375248343\C,-0.0106417213,-0.9892668358,1.4058549675\  
C,1.3684013987,-1.558207763,1.338004037\O,2.2769451588,-0.6386311487,1  
.7740105384\C,3.6420799902,-0.9284720078,1.839182071\C,4.3080956401,-0  
.4231535666,2.9537671557\C,5.6851117695,-0.5983477605,3.0673263364\C,6  
.4144617242,-1.2743870713,2.0800892356\C,7.9161672129,-1.4268868332,2.  
1891033616\C,8.6926376514,-0.242659167,1.5795674935\C,10.2136918951,-0

.3905849378,1.6986336923\C,10.9914783214,0.7856986966,1.0955447403\C,1  
2.5104180354,0.6341324258,1.2205931328\C,5.7152137878,-1.7686289191,0.  
9714766205\C,4.3368581533,-1.6020757123,0.8356019013\O,1.6375016241,-2  
.6710082358,0.9563685367\H,0.3263883689,1.2197285642,0.4734587825\H,-0  
.0032386449,0.0153416901,3.6084463162\H,-1.1324107047,-2.9043034864,2.  
3630377924\H,-0.8047572729,-1.7021460219,-0.7632507173\H,3.7389399527,  
0.0990008874,3.7155727892\H,6.1999046363,-0.2060447121,3.9408305166\H,  
8.1990495718,-1.532634184,3.2442375252\H,8.2287739037,-2.3532968341,1.  
6910010462\H,8.4124253004,-0.1373900816,0.5229561133\H,8.3723109689,0.  
6857963215,2.0710266184\H,10.4872419563,-0.500050972,2.7580728139\H,10  
.528883936,-1.3228347108,1.2080223113\H,10.7197755875,0.8935812264,0.0  
367624816\H,10.6750358223,1.7167513086,1.5850468394\H,12.8620121948,-0  
.2703088445,0.7111354541\H,13.0360260983,1.4881875638,0.7812023613\H,1  
2.8161652329,0.5601748592,2.2704667824\H,6.2573471846,-2.3008148174,0.  
1936908168\H,3.8123131153,-2.0017189766,-0.0216363887\B,-2.1551455237,  
0.3258207971,0.2690857795\B,-1.8335537015,0.9955401222,1.9768961773\B,  
-2.4127118769,-0.615902003,2.713811561\B,-2.7248305176,-1.2945835245,1  
.002908996\B,-3.2599736304,0.2135511258,1.5267092159\S,-4.9371475328,1  
.0618393934,1.6788802677\C,-5.7981462166,0.8982380756,0.0545082694\C,-  
6.2049543892,-0.527997255,-0.3100279527\C,-7.1092204561,-1.2199544685,  
0.7287970938\C,-6.3842830243,-1.3552544585,2.0820138024\C,-6.001562908  
6,-0.0234228484,2.7247007327\C,-7.5871340015,-2.5836582286,0.191876258  
6\C,-8.65987542,-3.2806840108,1.0396397535\C,-9.1898243283,-4.57037731  
41,0.3988438088\C,-10.2491048543,-5.2816820459,1.2491509863\C,-10.7793  
300193,-6.5656659202,0.6042368293\H,-2.4298649245,0.869664391,-0.75515  
2989\H,-1.8749708344,2.1066491574,2.3999419081\H,-2.9056854068,-0.8719  
348952,3.7685025944\H,-3.4734559523,-2.1292739032,0.6029620403\H,-6.66  
44699191,1.5630730382,0.1320598722\H,-5.0989551349,1.3251924957,-0.668  
0608974\H,-5.3064739376,-1.1302313792,-0.478015239\H,-6.7317569133,-0.  
4689656705,-1.2709798732\H,-7.9998133305,-0.5873555226,0.8799449262\H,  
-7.0289401217,-1.8690287443,2.8038547948\H,-5.4892143687,-1.9741388191  
,1.9593303823\H,-6.8812073002,0.586352241,2.9546595475\H,-5.4261013156  
, -0.1602851616,3.6428659572\H,-7.985447703,-2.4317301178,-0.8205859343  
\H,-6.7190376531,-3.24801532,0.0783568991\H,-8.2614814835,-3.521771400  
6,2.0336292189\H,-9.4982089143,-2.5885481979,1.2057347591\H,-9.6122505  
69,-4.338963539,-0.5893111694\H,-8.3509898179,-5.2567578465,0.21610882

```
39\H,-9.8236007943,-5.5159009472,2.2343799622\H,-11.0848059272,-4.5934
938199,1.436123335\H,-11.5325644443,-7.0483219088,1.2350347338\H,-11.2
4214075,-6.3594890597,-0.3674877531\H,-9.972490163,-7.288323543,0.4382
125279\\Version=EM64L-G09RevA.02\State=1-A\HF=-1674.8849855\RMSD=6.377
e-09\RMSF=2.668e-06\Dipole=-3.4721305,0.7239292,-0.026613\Quadrupole=3
8.7791475,-22.6087429,-16.1704046,-4.6800127,2.6951157,-0.2597175\PG=C
01 [X(C23H43B9O2S1)]\
```

## 10. References

- 1 G. H. Schmid, A. W. Wolkoff *Can. J. Chem.* 1972, **50**, 1181.
- 2 T. Nozaki, Y. Tanaka *Int. J. Appl. Rad. Isotopes* 1967, **18**, 111.
- 3 P. Kaszynski, J. Huang, G. S. Jenkins, K. A. Bairamov, D. Lipiak *Mol. Cryst. Liq. Cryst.* 1995, **260**, 315.
- 4 W. H. Knoth *J. Am. Chem. Soc.* 1966, **88**, 935.
- 5 R. N. Leyden, M. F. Hawthorne *Inorg. Chem.* 1975, **14**, 2444.
- 6 D. Naoufal, B. Gruner, B. Bonnetot, H. Mongeot *Polyhedron* 1999, **18**, 931.
- 7 M. Komura, H. Nakai, M. Shiro *J. Chem. Soc., Dalton Trans.* 1987, 1953.
- 8 M. F. Hawthorne, F. P. Olsen *J. Am. Chem. Soc.* 1965, **87**, 2366.
- 9 J. L. Born, W. M. Hadley *J. Pharm. Sci.* 1980, **69**, 465.
- 10 A. D. Becke *J. Chem. Phys.* 1993, **98**, 5648.
- 11 C. Lee, W. Yang, R. G. Parr *Phys. Rev. B*, 1988, **37**, 785.
- 12 Frisch, M. J. *et al* Gaussian 09, Revision C.01, Gaussian, Inc., Wallingford CT, 2011.
- 13 A. P. Scott, L. Radom *J. Phys. Chem.* 1996, **100**, 16502.
- 14 R. E. Stratmann, G. E. Scuseria, M. J. Frisch *J. Chem. Phys.* 1998, **109**, 8218.
- 15 M. Cossi, G. Scalmani, N. Rega, V. Barone *J. Chem. Phys.* 2002, **117**, 43.
- 16 J. E. Rice, N. C. Handy *Int. J. Quantum Chem.* 1992, **43**, 91.
- 17 C. Peng, P. Y. Ayala, H. B. Schlegel, M. J. Frisch *J. Comp. Chem.* 1996, **17**, 49.
- 18 H. Booth, J. R. Everett *J. Chem. Soc., Perkin Trans. 2* 1980, 255.
- 19 D. F. Eaton *Pure Appl. Chem.* 1988, **60**, 1107.
- 20 C. Reichardt *Chem. Rev.* 1994, **94**, 2319.

- 21 Lippert, E. V. Z. *Elektrochem.* **1957**, *61*, 962–975. Mataga, K. N.; Kaifu, Y.; Koizumi, M. *Bull. Chem. Soc. Jpn.* **1956**, *29*, 465–470.
- 22 B. Ringstrand, P. Kaszynski *J. Mater. Chem.* 2011, **21**, 90.
